# Supplementary material for: The Global Burden of Type 2 Diabetes Attributable to Dietary Risks: Insights from the Global Burden of Disease Study 2019
Source: Preprints.org preprint supplement (doi:10.20944/preprints202310.0189.v1), 2023-10-04
Supplement: Supplementary file 2 [file supplementary]

**Supplementary Information**

The online version contains supplementary material available at [insert link].

**Table S1.** Dietary Risk factors, definitions, and summary exposure values (Source: Global burden of 87 risk factors in 204 countries and territories, 1990–2019: a systematic analysis for the Global Burden of Disease Study 2019)

**Table S2.** Percent of T2DM burden attributable to various risks in 2019

**Table S3.** The number of cases and ASR of deaths attributable to diet-related T2DM in 204 countries and territories in 1990 and 2019 and the change of deaths between 1990 and 2019

**Table S4.** The number of cases and ASR of DALYs attributable to diet-related T2DM in 204 countries and territories in 1990 and 2019 and the change of DALYs between 1990 and 2019

**Figure S1.** ASMR for T2DM attributable to dietary risk factors in 2019 in 204 countries and territories

**Figure S2.** EAPC of ASMR for T2DM attributable to dietary risk factors, between 1990 and 2019 in 204 countries and territories

**Figure S3.** ASDR for T2DM attributable to dietary risk factors in 2019 in 204 countries and territories

**Figure S4.** EAPC of ASDR for T2DM attributable to dietary risk factors, between 1990 and 2019 in 204 countries and territories

**­­**

**Table S1.** Dietary Risk factors, definitions, and summary exposure values (Source: Global burden of 87 risk factors in 204 countries and territories, 1990–2019: a systematic analysis for the Global Burden of Disease Study 2019)

| **Risk factors** | **Definition** | **Summary exposure values 2019** |
| --- | --- | --- |
| Diet low in fruit | Average daily consumption of fruit should be no less than 310-340 grams per day, including fresh, frozen, cooked, canned, or dried fruit, but excluding fruit juices and salted or pickled fruits. | 56.86 (49.36, 65.37) |
| Diet low in fiber | Average daily fiber consumption from fruits, vegetables, grains, legumes, and pulses should be at least 21-22 grams daily. | 27.62 (18.60, 36.95) |
| Diet low in nuts and seeds | Average daily nut and seed consumption, including tree nuts and peanuts, should be at least 10-19 grams per day. | 47.47 (23.73, 66.35) |
| Diet low in whole grains | Average daily consumption of 140-160 grams of whole grains per day from various sources like breakfast cereals, bread, rice, pasta, biscuits, muffins, tortillas, pancakes, and others. | 78.81 (71.06, 86.78) |
| Diet high in red meat | Red meat intake, excluding poultry, fish, eggs, and processed meats, in grams per day. | 43.94 (38.03, 49.58) |
| Diet high in processed meat | Consuming any amount of smoked, cured, salted, or chemically preserved meat daily | 29.81 (19.04, 43.32) |
| Diet high in sugar-sweetened beverages (SSBs) | Intake of beverages with ≥50 kcal per 226.8 gram serving, including carbonated beverages, sodas, energy drinks, fruit drinks, excluding 100% fruit and vegetable juices. | 30.36 (22.71, 43.05) |

**Table S2.** Percent of T2DM burden attributable to various risks in 2019

| **Measure** | **Risks** | **Percent (%）** | **95% UI** | |
| --- | --- | --- | --- | --- |
| **Lower** | **Upper** |
| Deaths | 1. Environmental/occupational risks | 25,64 | 20,11 | 31,51 |
| 1.1. Particulate matter pollution | 19,86 | 14,20 | 25,49 |
| 1.1.1. Ambient particulate matter pollution | 13,36 | 9,49 | 17,53 |
| 1.1.2. Household air pollution from solid fuels | 6,50 | 4,22 | 9,53 |
| 1.2. Non-optimal temperature | 7,17 | 4,64 | 10,20 |
| 1.2.1. High temperature | 2,15 | 0,44 | 5,31 |
| 1.2.2 Low temperature | 5,07 | 2,75 | 7,28 |
| 2. Behavioral risks | 43,08 | 37,12 | 48,78 |
| 2.1. Tobacco | 15,99 | 11,07 | 20,10 |
| 2.1.1. Smoking | 8,22 | 6,71 | 9,78 |
| 2.1.2. Secondhand smoke | 8,38 | 3,23 | 12,86 |
| 2.2. Alcohol use | -0,21 | -1,86 | 1,38 |
| 2.3. Dietary risks | 26,07 | 21,58 | 30,27 |
| 2.3.1. Diet low in fruits | 6,00 | 3,70 | 8,59 |
| 2.3.2. Diet low in whole grains | 4,93 | 1,69 | 7,38 |
| 2.3.3. Diet low in nuts and seeds | 1,94 | 0,56 | 3,69 |
| 2.3.4. Diet high in red meat | 5,57 | 3,17 | 7,83 |
| 2.3.5. Diet high in processed meat | 4,97 | 3,49 | 5,94 |
| 2.3.6. Diet high in sugar-sweetened beverages | 3,33 | 2,07 | 4,28 |
| 2.3.7. Diet low in fiber | 2,78 | 1,25 | 4,40 |
| 2.4. Low physical activity | 8,50 | 4,24 | 14,10 |
| 3. Metabolic risks | 100,00 | 100,00 | 100,00 |
| 3.1. High fasting plasma glucose | 100,00 | 100,00 | 100,00 |
| 3.2. High body-mass index | 42,06 | 30,19 | 54,39 |
| DALYs | 1. Environmental/occupational risks | 22,15 | 16,42 | 27,75 |
| 1.1. Particulate matter pollution | 19,55 | 13,94 | 25,00 |
| 1.1.1. Ambient particulate matter pollution | 13,63 | 9,73 | 17,87 |
| 1.1.2. Household air pollution from solid fuels | 5,92 | 3,81 | 8,64 |
| 1.2. Non-optimal temperature | 3,25 | 1,98 | 4,86 |
| 1.2.1. High temperature | 1,07 | 0,21 | 2,68 |
| 1.2.2 Low temperature | 2,19 | 1,10 | 3,37 |
| 2. Behavioral risks | 44,11 | 38,35 | 49,66 |
| 2.1. Tobacco | 17,87 | 12,76 | 22,12 |
| 2.1.1. Smoking | 9,86 | 8,24 | 11,53 |
| 2.1.2. Secondhand smoke | 8,75 | 3,40 | 13,39 |
| 2.2. Alcohol use | -0,07 | -2,09 | 1,91 |
| 2.3. Dietary risks | 27,08 | 22,55 | 31,30 |
| 2.3.1. Diet low in fruits | 5,95 | 3,66 | 8,56 |
| 2.3.2. Diet low in whole grains | 4,97 | 1,72 | 7,43 |
| 2.3.3. Diet low in nuts and seeds | 1,99 | 0,59 | 3,79 |
| 2.3.4. Diet high in red meat | 6,22 | 3,77 | 8,55 |
| 2.3.5. Diet high in processed meat | 5,55 | 3,90 | 6,70 |
| 2.3.6. Diet high in sugar-sweetened beverages | 3,52 | 2,12 | 4,59 |
| 2.3.7. Diet low in fiber | 2,68 | 1,16 | 4,27 |
| 2.4. Low physical activity | 6,87 | 3,32 | 11,88 |
| 3. Metabolic risks | 100,00 | 100,00 | 100,00 |
| 3.1. High fasting plasma glucose | 100,00 | 100,00 | 100,00 |
| 3.2. High body-mass index | 51,90 | 38,86 | 64,46 |

*DALY, disability-adjusted life-years; UI, uncertainty interval.*

**Table S3.** The number of cases and ASR of deaths attributable to diet-related T2DM in 204 countries and territories in 1990 and 2019 and the change of deaths between 1990 and 2019

| **Country** | **1990** | | **2019** | | **1990-2019** |
| --- | --- | --- | --- | --- | --- |
| **Deaths cases** | **ASMR per 100,000** | **Deaths cases** | **ASMR per 100,000** | **EAPC in ASMR** |
| **No. (95% *UI*)** | **No. (95% *UI*)** | **No. (95% *UI*)** | **No. (95% *UI*)** | **No. (95% *CI*)** |
| Afghanistan | 541,19 (333,67, 854,48) | 4,74 (2,92, 7,48) | 1238,44 (698,02, 1909,92) | 3,24 (1,82, 4,99) | -0,74 (-1,05, -0,42) |
| Albania | 28,55 (23,18, 34,19) | 0,86 (0,7, 1,03) | 55,29 (39,16, 74,35) | 2,03 (1,44, 2,73) | 2,67 (2,19, 3,16) |
| Algeria | 392,73 (257,64, 577,44) | 1,55 (1,02, 2,28) | 1051,01 (708,65, 1452,54) | 2,51 (1,69, 3,47) | 1,88 (1,53, 2,23) |
| American Samoa | 3,24 (2,32, 4,21) | 6,69 (4,78, 8,69) | 8,73 (6,3, 11,27) | 15,74 (11,35, 20,3) | 3,04 (2,78, 3,3) |
| Andorra | 1,18 (0,84, 1,66) | 2,18 (1,55, 3,07) | 3,06 (2,3, 4,01) | 3,68 (2,77, 4,83) | 1,9 (1,75, 2,06) |
| Angola | 367,88 (265,93, 493,02) | 3,57 (2,58, 4,78) | 826,92 (577,58, 1132,78) | 2,74 (1,92, 3,76) | -1,19 (-1,35, -1,03) |
| Antigua and Barbuda | 8,15 (6,36, 9,87) | 13,41 (10,47, 16,26) | 13,34 (10,31, 16,97) | 15,08 (11,65, 19,18) | -0,01 (-0,31, 0,29) |
| Argentina | 2469,88 (2103,34, 2833,36) | 7,46 (6,35, 8,55) | 3795,44 (3169,45, 4410,17) | 8,41 (7,03, 9,78) | -0,11 (-0,38, 0,15) |
| Armenia | 138,49 (112,79, 163,02) | 4,06 (3,3, 4,77) | 337,4 (251,3, 420,83) | 11,17 (8,32, 13,94) | 2,46 (1,58, 3,34) |
| Australia | 821,63 (701,19, 938,73) | 4,87 (4,16, 5,57) | 1571,03 (1291,07, 1849,99) | 6,39 (5,26, 7,53) | 0,68 (0,37, 0,99) |
| Austria | 514,07 (428,08, 597,62) | 6,62 (5,51, 7,69) | 755,98 (611,22, 903,24) | 8,48 (6,86, 10,13) | 1,4 (0,95, 1,86) |
| Azerbaijan | 161,79 (128,94, 194,48) | 2,21 (1,76, 2,65) | 589,1 (443,45, 753,58) | 5,73 (4,31, 7,33) | 2,51 (2,07, 2,96) |
| Bahamas | 18,57 (14,57, 22,54) | 7,24 (5,68, 8,79) | 35,97 (26,79, 46,57) | 9,54 (7,11, 12,35) | 0,38 (0,13, 0,63) |
| Bahrain | 19,21 (13,81, 25,23) | 3,78 (2,72, 4,97) | 135,62 (90,48, 185,26) | 9,4 (6,27, 12,84) | 2,56 (2,28, 2,84) |
| Bangladesh | 3262,06 (2622,53, 3996,61) | 2,99 (2,4, 3,66) | 9107,54 (6906,1, 11719,92) | 5,72 (4,34, 7,36) | 2,06 (1,75, 2,38) |
| Barbados | 57,99 (46,63, 69,51) | 22,84 (18,37, 27,38) | 74,53 (54,61, 94,58) | 25,03 (18,34, 31,76) | -0,29 (-0,52, -0,07) |
| Belarus | 220,36 (188,03, 250,7) | 2,1 (1,8, 2,39) | 132,54 (100,85, 169,65) | 1,4 (1,06, 1,79) | -3,15 (-3,73, -2,57) |
| Belgium | 627,12 (519,88, 730,31) | 6,28 (5,21, 7,32) | 623,19 (499,12, 740,36) | 5,46 (4,37, 6,48) | -0,74 (-0,91, -0,57) |
| Belize | 6,24 (4,38, 8,08) | 3,36 (2,36, 4,35) | 22,93 (15,69, 30,07) | 5,59 (3,83, 7,33) | 1,69 (1,23, 2,14) |
| Benin | 119,62 (92,95, 150,83) | 2,47 (1,92, 3,11) | 324,87 (235,59, 430,21) | 2,56 (1,86, 3,4) | 0,1 (-0,06, 0,26) |
| Bermuda | 4,44 (3,43, 5,44) | 7,47 (5,77, 9,15) | 6,55 (5,03, 8,37) | 10,23 (7,86, 13,08) | 0,95 (0,81, 1,1) |
| Bhutan | 10,67 (7,23, 14,67) | 1,74 (1,18, 2,4) | 39,73 (28,06, 53,6) | 5,27 (3,72, 7,11) | 3,71 (3,63, 3,79) |
| Bolivia | 260,79 (184,08, 345,93) | 4,06 (2,87, 5,39) | 837,98 (589,62, 1138,18) | 6,98 (4,91, 9,48) | 2,04 (1,98, 2,11) |
| Bosnia and Herzegovina | 136,14 (106,27, 164,44) | 3 (2,34, 3,62) | 561,71 (375,61, 755,49) | 17,02 (11,38, 22,89) | 6,83 (6,24, 7,42) |
| Botswana | 84,33 (60,74, 112,42) | 6,48 (4,67, 8,64) | 295,47 (202,26, 405,96) | 12,63 (8,65, 17,36) | 1,93 (1,56, 2,31) |
| Brazil | 6455,39 (5154,74, 7700,53) | 4,34 (3,46, 5,17) | 17339,6 (14209,5, 20568,95) | 8 (6,56, 9,49) | 2,18 (2,13, 2,23) |
| Brunei | 23,55 (18,15, 29,67) | 9,11 (7,02, 11,48) | 46,45 (36,3, 56,03) | 10,63 (8,3, 12,82) | 1,03 (0,72, 1,35) |
| Bulgaria | 649,71 (539,32, 756,84) | 7,48 (6,21, 8,72) | 780,13 (598,12, 986,48) | 11,25 (8,63, 14,23) | 0,75 (0,4, 1,1) |
| Burkina Faso | 354,68 (272,78, 450,91) | 3,71 (2,85, 4,72) | 740,9 (567,63, 955,99) | 3,27 (2,5, 4,21) | -0,67 (-0,83, -0,51) |
| Burundi | 152,66 (100,48, 226,79) | 2,74 (1,8, 4,07) | 214,81 (140,43, 301,22) | 1,8 (1,18, 2,52) | -1,98 (-2,21, -1,76) |
| Cambodia | 5,43 (4,22, 7,39) | 1,54 (1,2, 2,1) | 32,43 (24,53, 40,23) | 5,75 (4,35, 7,14) | 3,78 (3,1, 4,45) |
| Cameroon | 344,02 (246,39, 449,75) | 3,32 (2,37, 4,33) | 819,24 (593,58, 1070,96) | 4,93 (3,58, 6,45) | 1,37 (1,21, 1,52) |
| Canada | 268,23 (185,34, 364,35) | 2,58 (1,78, 3,51) | 942,41 (650,8, 1331,13) | 3,24 (2,24, 4,57) | 0,59 (0,28, 0,9) |
| Cape Verde | 1253,44 (1039,73, 1463,94) | 4,6 (3,81, 5,37) | 2211,09 (1811,29, 2622,74) | 6,05 (4,96, 7,18) | 0,03 (-0,64, 0,7) |
| Central African Republic | 125 (92,11, 166,61) | 4,56 (3,36, 6,07) | 241,71 (167,64, 329,76) | 4,56 (3,16, 6,22) | 0,13 (0,08, 0,18) |
| Chad | 201,47 (153,24, 260,95) | 3,35 (2,54, 4,33) | 497,62 (366,35, 659,41) | 3,03 (2,23, 4,02) | -0,47 (-0,72, -0,21) |
| Chile | 524,28 (442,08, 603,62) | 3,95 (3,33, 4,55) | 1459,22 (1209,53, 1707,27) | 8,02 (6,65, 9,38) | 2,43 (2,28, 2,57) |
| China | 16985,75 (13217,48, 21229,31) | 1,43 (1,12, 1,79) | 41951,86 (31431,38, 52994,94) | 2,95 (2,21, 3,73) | 2,7 (2,48, 2,91) |
| Colombia | 735,89 (559,13, 910,56) | 2,26 (1,72, 2,8) | 1601,05 (1126,33, 2172,63) | 3,35 (2,36, 4,55) | 0,6 (0,25, 0,94) |
| Comoros | 12,86 (7,43, 18,47) | 2,76 (1,6, 3,97) | 29,25 (20,49, 39,97) | 4,1 (2,87, 5,6) | 1,3 (1,18, 1,42) |
| Congo | 122,75 (88,92, 159,05) | 5,02 (3,64, 6,51) | 258,78 (183,49, 348,98) | 4,91 (3,48, 6,63) | -0,27 (-0,45, -0,1) |
| Cook Islands | 2,82 (2, 3,7) | 14,81 (10,52, 19,45) | 5,29 (3,74, 7,01) | 29,43 (20,78, 38,97) | 2,28 (2,14, 2,42) |
| Costa Rica | 61,92 (45,89, 76,56) | 2,04 (1,51, 2,52) | 134,27 (92,99, 180,71) | 2,85 (1,97, 3,83) | 0,46 (-0,13, 1,05) |
| Cote d'Ivoire | 224,16 (160,18, 293,21) | 1,83 (1,31, 2,4) | 706,58 (486,5, 931,93) | 2,7 (1,86, 3,56) | 1,06 (0,73, 1,38) |
| Croatia | 177,86 (134,42, 219,2) | 3,63 (2,74, 4,47) | 275,45 (197,05, 364,58) | 6,48 (4,64, 8,58) | 1,57 (1,3, 1,83) |
| Cuba | 505,36 (380,11, 628,49) | 4,67 (3,51, 5,8) | 401,15 (277,96, 534,96) | 3,53 (2,45, 4,71) | -1,23 (-2,21, -0,24) |
| Cyprus | 130,47 (96,68, 163,7) | 16,77 (12,43, 21,04) | 146,86 (111,76, 180,45) | 11,18 (8,51, 13,74) | -2,05 (-2,26, -1,83) |
| Czech | 561,64 (459,9, 655,77) | 5,45 (4,47, 6,37) | 1073,04 (835,23, 1347,38) | 10,08 (7,85, 12,66) | 4,19 (3,14, 5,25) |
| Denmark | 429,29 (299,04, 575,16) | 2,04 (1,42, 2,73) | 873,38 (637,03, 1159,56) | 3,33 (2,43, 4,42) | 1,81 (1,72, 1,9) |
| Djibouti | 929,85 (631,3, 1248,88) | 2,41 (1,64, 3,24) | 2262,02 (1577,44, 3077,22) | 2,58 (1,8, 3,51) | 0,04 (-0,12, 0,21) |
| Dominica | 293,86 (246,61, 340,75) | 5,71 (4,79, 6,62) | 485,9 (396,21, 575,27) | 8,37 (6,83, 9,91) | 1,36 (0,91, 1,81) |
| Dominican Republic | 11,53 (8,2, 15,75) | 2,37 (1,69, 3,24) | 56,97 (40,33, 79,79) | 4,74 (3,35, 6,63) | 2,11 (2,02, 2,2) |
| DR Congo | 9,82 (7,25, 12,29) | 13,27 (9,8, 16,6) | 11,2 (8,03, 14,54) | 16,31 (11,7, 21,17) | 0,28 (0,07, 0,48) |
| Ecuador | 137,09 (96,39, 175,16) | 1,9 (1,34, 2,43) | 503,09 (326,58, 707,54) | 4,62 (3, 6,5) | 3,47 (3,26, 3,68) |
| Egypt | 232,91 (167,05, 295,83) | 2,32 (1,67, 2,95) | 1149,65 (788,13, 1536,83) | 6,54 (4,48, 8,74) | 3,56 (3,19, 3,92) |
| El Salvador | 1062,31 (727,95, 1378,94) | 1,91 (1,31, 2,48) | 3263,66 (2093,59, 4784,58) | 3,29 (2,11, 4,83) | 2,28 (2,03, 2,53) |
| Equatorial Guinea | 94,43 (67,27, 119,49) | 1,79 (1,28, 2,27) | 416,81 (279,23, 575,3) | 6,66 (4,46, 9,2) | 4,64 (4,31, 4,97) |
| Eritrea | 18,56 (12,78, 25,3) | 4,31 (2,97, 5,88) | 41,77 (26,84, 62,42) | 2,94 (1,89, 4,4) | -1,25 (-1,74, -0,76) |
| Estonia | 74,46 (48,55, 110,05) | 2,48 (1,62, 3,67) | 213 (141,54, 301,09) | 3,17 (2,11, 4,49) | 0,79 (0,73, 0,85) |
| Eswatini | 25,67 (20,85, 31,27) | 1,64 (1,33, 1,99) | 44,31 (31,96, 58,3) | 3,38 (2,44, 4,44) | 2,38 (1,44, 3,32) |
| Ethiopia | 54,66 (38,81, 71,2) | 6,78 (4,81, 8,83) | 158,96 (106,2, 222,27) | 13,92 (9,3, 19,46) | 2,91 (2,32, 3,51) |
| Fiji | 2714,99 (2044,96, 3639,36) | 5,28 (3,98, 7,08) | 3089,33 (2371,68, 3855,31) | 2,87 (2,2, 3,58) | -2,4 (-2,66, -2,13) |
| Finland | 141,46 (104,7, 185,78) | 18,63 (13,79, 24,47) | 429,89 (310,74, 563,02) | 47,18 (34,1, 61,79) | 2,93 (2,58, 3,28) |
| France | 169,44 (141,11, 198,87) | 3,38 (2,82, 3,97) | 160,63 (129,96, 189,65) | 2,9 (2,35, 3,43) | -0,92 (-1,18, -0,65) |
| Gabon | 2709,97 (2271,64, 3137,15) | 4,69 (3,93, 5,43) | 4824,73 (3883,41, 5726,04) | 7,29 (5,87, 8,65) | 1,46 (0,94, 1,98) |
| Gambia | 74,67 (52,77, 103,98) | 7,53 (5,32, 10,49) | 127,73 (88,34, 170,81) | 7,3 (5,05, 9,76) | -0,19 (-0,27, -0,12) |
| Georgia | 20,32 (14,61, 26,48) | 2,05 (1,47, 2,67) | 81,77 (58,88, 106,89) | 3,64 (2,62, 4,76) | 1,89 (1,58, 2,2) |
| Germany | 181,87 (145,22, 220,76) | 3,3 (2,64, 4,01) | 400,36 (314,23, 500,37) | 10,92 (8,57, 13,65) | 5,13 (4,71, 5,57) |
| Ghana | 7550,87 (6264,19, 8863,65) | 9,45 (7,84, 11,09) | 8156,15 (6671,92, 9652,65) | 9,61 (7,86, 11,37) | -0,22 (-0,5, 0,06) |
| Greece | 326,11 (234,41, 428,89) | 2,17 (1,56, 2,86) | 1037,53 (723,56, 1379,81) | 3,29 (2,29, 4,38) | 1,6 (1,32, 1,87) |
| Greenland | 362,76 (303,59, 421,06) | 3,49 (2,92, 4,05) | 446,58 (367,89, 520,89) | 4,32 (3,56, 5,04) | 1,57 (1,05, 2,09) |
| Grenada | 1,73 (1,38, 2,11) | 3,11 (2,48, 3,8) | 2,16 (1,64, 2,73) | 3,85 (2,91, 4,86) | 0,35 (0,19, 0,51) |
| Guam | 10,38 (7,6, 13,09) | 12,12 (8,87, 15,28) | 14,55 (10,55, 18,54) | 14,09 (10,22, 17,96) | 0,59 (0,37, 0,81) |
| Guatemala | 5,05 (3,7, 6,56) | 3,69 (2,7, 4,79) | 9,7 (6,99, 12,81) | 5,68 (4,1, 7,51) | 1,35 (1,06, 1,65) |
| Guinea | 109,23 (80,49, 138,96) | 1,37 (1,01, 1,74) | 1253,45 (862,3, 1688,08) | 7,05 (4,85, 9,5) | 5,04 (4,41, 5,68) |
| Guinea-Bissau | 165,73 (116,52, 219,65) | 2,68 (1,88, 3,55) | 373,8 (257,7, 514,25) | 2,96 (2,04, 4,07) | 0,44 (0,06, 0,82) |
| Guyana | 39,28 (28,06, 52,36) | 3,9 (2,79, 5,2) | 74,64 (52,5, 102,53) | 3,93 (2,76, 5,39) | -0,03 (-0,15, 0,1) |
| Haiti | 62,17 (45,79, 78,52) | 8,07 (5,95, 10,2) | 114,62 (80,39, 151,67) | 14,87 (10,43, 19,68) | 2,06 (1,69, 2,42) |
| Honduras | 411,03 (270,59, 570,72) | 6,47 (4,26, 8,98) | 785,48 (488,04, 1194,31) | 6,33 (3,94, 9,63) | -0,03 (-0,09, 0,02) |
| Hungary | 48,56 (33,8, 64,19) | 1,03 (0,72, 1,36) | 223,31 (156,43, 305,2) | 2,28 (1,59, 3,11) | 2,95 (2,78, 3,12) |
| Iceland | 548,12 (449,6, 641,55) | 5,27 (4,33, 6,17) | 812,34 (623,05, 1021,99) | 8,4 (6,44, 10,56) | 2,1 (1,74, 2,46) |
| India | 5,97 (5,09, 6,92) | 2,35 (2, 2,73) | 9,42 (7,56, 11,21) | 2,73 (2,19, 3,25) | 0,13 (-0,03, 0,29) |
| Indonesia | 18042,21 (13751,38, 22855,51) | 2,11 (1,61, 2,67) | 63437,15 (49737,73, 78727,56) | 4,56 (3,58, 5,66) | 2,71 (2,59, 2,84) |
| Iran | 6544,86 (5108,27, 8055,41) | 3,53 (2,76, 4,35) | 18613,74 (13224,77, 23609,36) | 7,17 (5,1, 9,1) | 2,69 (2,55, 2,84) |
| Iraq | 524,92 (388,55, 667,25) | 0,9 (0,66, 1,14) | 2875,89 (2189,89, 3539,3) | 3,41 (2,6, 4,2) | 5,15 (4,81, 5,5) |
| Ireland | 722,2 (495,66, 968,61) | 4,1 (2,82, 5,5) | 2039,34 (1449,73, 2658,39) | 4,84 (3,44, 6,31) | 0,47 (0,33, 0,62) |
| Israel | 154,7 (130,14, 177,16) | 4,3 (3,61, 4,92) | 181,53 (149,82, 213,16) | 3,7 (3,05, 4,34) | -1,01 (-1,17, -0,84) |
| Italy | 197,83 (153, 237,03) | 3,99 (3,08, 4,78) | 723,23 (577,57, 872,07) | 7,77 (6,2, 9,37) | 1,18 (0,17, 2,2) |
| Jamaica | 6274,16 (5297,45, 7143,48) | 11,05 (9,33, 12,58) | 7517,27 (6105,77, 8780,34) | 12,46 (10,12, 14,56) | 0,29 (0,19, 0,38) |
| Japan | 203,59 (143,5, 260,96) | 8,61 (6,07, 11,04) | 445,23 (306,21, 587,79) | 15,84 (10,89, 20,91) | 1,93 (1,67, 2,2) |
| Jordan | 2953,59 (2413,42, 3452,5) | 2,35 (1,92, 2,74) | 2501,98 (1917,47, 3045,66) | 1,96 (1,5, 2,38) | -0,58 (-1, -0,16) |
| Kazakhstan | 160,46 (117,36, 206,93) | 4,25 (3,11, 5,48) | 485,76 (358,22, 631,84) | 4,17 (3,08, 5,43) | -0,68 (-1,19, -0,16) |
| Kenya | 344,24 (295,34, 387,82) | 2,1 (1,8, 2,37) | 944,99 (755,71, 1142,73) | 5,14 (4,11, 6,21) | 1,54 (0,69, 2,39) |
| Kiribati | 459,81 (348,54, 578,6) | 1,98 (1,5, 2,49) | 1346,41 (980,89, 1777,24) | 2,68 (1,95, 3,54) | 1,04 (0,93, 1,14) |
| Kuwait | 11,19 (7,86, 14,82) | 15,11 (10,62, 20,01) | 26,52 (17,57, 36,86) | 22,36 (14,81, 31,07) | 0,98 (0,64, 1,33) |
| Kyrgyzstan | 30,82 (23,27, 38,22) | 1,75 (1,32, 2,17) | 84,78 (60,77, 110,51) | 1,92 (1,37, 2,5) | -0,54 (-1,54, 0,48) |
| Laos | 71,25 (60,48, 81,66) | 1,6 (1,36, 1,83) | 105,5 (84,84, 127,08) | 1,61 (1,3, 1,94) | -1,38 (-1,9, -0,85) |
| Latvia | 185,92 (129,92, 257,33) | 4,48 (3,13, 6,2) | 297,93 (206,75, 410,54) | 4,16 (2,89, 5,74) | -0,54 (-0,69, -0,39) |
| Lebanon | 67,34 (56,87, 78,65) | 2,53 (2,14, 2,96) | 122,11 (92,63, 155,84) | 6,38 (4,84, 8,14) | 3,36 (2,91, 3,81) |
| Lesotho | 75,93 (54,14, 100,04) | 2,32 (1,65, 3,05) | 165,6 (105,52, 229,57) | 3,2 (2,04, 4,43) | 1,42 (1,25, 1,6) |
| Liberia | 108,47 (79,04, 139,06) | 6 (4,37, 7,69) | 300,62 (201,88, 419,56) | 14,37 (9,65, 20,06) | 3,84 (3,43, 4,24) |
| Libya | 71,69 (52,85, 92,01) | 3,65 (2,69, 4,68) | 153,55 (107,38, 208,74) | 3,21 (2,24, 4,36) | -0,78 (-0,96, -0,6) |
| Lithuania | 52,22 (34,88, 71,9) | 1,23 (0,82, 1,7) | 180,58 (119,85, 260,7) | 2,68 (1,78, 3,87) | 2,93 (2,53, 3,33) |
| Luxembourg | 62,72 (52,01, 74,33) | 1,71 (1,42, 2,02) | 82,47 (63,28, 105,77) | 2,95 (2,26, 3,79) | 1,82 (1,57, 2,07) |
| Madagascar | 21,78 (18,3, 25,47) | 5,71 (4,8, 6,68) | 25,65 (20,33, 31,05) | 4,15 (3,29, 5,02) | -1,15 (-1,27, -1,02) |
| Malawi | 330,41 (240,8, 430,29) | 2,76 (2,01, 3,6) | 631,42 (437,56, 866,2) | 2,37 (1,64, 3,25) | -0,7 (-0,84, -0,56) |
| Malaysia | 239,07 (170,98, 304,05) | 2,5 (1,79, 3,18) | 416,69 (298,68, 552,87) | 2,26 (1,62, 3) | -0,83 (-1,1, -0,56) |
| Maldives | 526,66 (406,85, 644,72) | 2,98 (2,3, 3,65) | 660,54 (439,36, 933,19) | 2,11 (1,4, 2,98) | -2,11 (-2,61, -1,61) |
| Mali | 5,35 (3,85, 7,28) | 2,41 (1,73, 3,28) | 10,51 (7,56, 13,8) | 2,11 (1,52, 2,77) | -0,75 (-1,03, -0,48) |
| Malta | 292,31 (220,89, 371,45) | 3,37 (2,55, 4,28) | 679,59 (489,82, 883,51) | 3,1 (2,23, 4,03) | -0,48 (-0,61, -0,35) |
| Marshall Islands | 36,74 (30,81, 42,93) | 9,91 (8,31, 11,58) | 45,98 (37,21, 55,31) | 10,47 (8,47, 12,59) | 0,33 (0,07, 0,59) |
| Mauritania | 2,69 (1,92, 3,56) | 5,88 (4,2, 7,79) | 7,44 (4,96, 10,68) | 13,1 (8,73, 18,78) | 2,89 (2,78, 3) |
| Mauritius | 98,64 (77,26, 123,91) | 4,77 (3,74, 6) | 191,53 (139,28, 254,27) | 4,77 (3,47, 6,33) | 0 (-0,05, 0,04) |
| Mexico | 84,57 (67,62, 101,57) | 7,69 (6,15, 9,23) | 439,26 (317,6, 564,24) | 34,41 (24,88, 44,2) | 7,38 (6,4, 8,37) |
| Micronesia | 6255,2 (4992,11, 7435,87) | 7,32 (5,84, 8,7) | 17830,33 (13589,88, 22187,17) | 14,27 (10,88, 17,76) | 2,22 (1,98, 2,45) |
| Moldova | 8,97 (6,18, 12,43) | 8,6 (5,92, 11,92) | 22,99 (14,5, 33,22) | 22,51 (14,2, 32,53) | 3,36 (3,17, 3,55) |
| Monaco | 0,94 (0,7, 1,18) | 3,07 (2,31, 3,89) | 1,37 (1,06, 1,7) | 3,66 (2,81, 4,54) | 0,66 (0,46, 0,86) |
| Mongolia | 20,4 (15,96, 26,3) | 0,95 (0,74, 1,22) | 52,05 (38,71, 69,56) | 1,54 (1,14, 2,05) | 1,53 (1,44, 1,62) |
| Montenegro | 21,32 (16,51, 26,11) | 3,41 (2,64, 4,17) | 41,32 (31,58, 51,53) | 6,66 (5,09, 8,31) | 2,51 (2,27, 2,75) |
| Morocco | 341,13 (233,4, 483,57) | 1,35 (0,92, 1,91) | 1198,24 (803,16, 1644,71) | 3,33 (2,23, 4,57) | 3,48 (3,19, 3,77) |
| Mozambique | 454,93 (336,36, 582,04) | 3,48 (2,57, 4,45) | 985,57 (703,7, 1340,74) | 3,34 (2,38, 4,54) | 0,19 (-0,02, 0,4) |
| Myanmar | 2898,29 (2098,95, 3841,79) | 7,05 (5,11, 9,35) | 4729,39 (3482,28, 6007,7) | 8,65 (6,37, 10,99) | 0,56 (0,45, 0,67) |
| Namibia | 113,29 (85,07, 141,41) | 8,04 (6,03, 10,03) | 220,4 (160,17, 292,75) | 9,17 (6,67, 12,18) | 0,03 (-0,33, 0,39) |
| Nauru | 0,78 (0,53, 1,09) | 7,56 (5,15, 10,62) | 1,23 (0,8, 1,88) | 11,65 (7,6, 17,82) | 1,24 (0,9, 1,59) |
| Nepal | 237,24 (175,57, 311,56) | 1,21 (0,9, 1,59) | 877,48 (632,4, 1131,64) | 2,88 (2,08, 3,72) | 3,33 (2,91, 3,76) |
| Netherlands | 1184,69 (979,31, 1374,25) | 7,94 (6,56, 9,21) | 1138,72 (926,91, 1347,73) | 6,64 (5,4, 7,86) | -1,12 (-1,47, -0,76) |
| New Zealand | 143,57 (120,5, 166,07) | 4,2 (3,53, 4,86) | 236,57 (198,19, 276,25) | 5,26 (4,41, 6,14) | -0,12 (-0,57, 0,33) |
| Nicaragua | 97,51 (75,86, 120,51) | 2,51 (1,95, 3,1) | 446,69 (332,72, 566,46) | 6,86 (5,11, 8,7) | 3,08 (2,73, 3,44) |
| Niger | 173,31 (128,66, 227,13) | 2,16 (1,6, 2,83) | 521,69 (374,11, 686,6) | 2,24 (1,61, 2,95) | 0,01 (-0,12, 0,14) |
| Nigeria | 2675,22 (1981,16, 3432,71) | 2,97 (2,2, 3,81) | 5115,81 (3683,52, 6805,24) | 2,38 (1,71, 3,17) | -0,85 (-0,89, -0,81) |
| Niue | 0,4 (0,28, 0,55) | 17,4 (12,18, 23,74) | 0,52 (0,35, 0,71) | 30,91 (21, 42,59) | 1,99 (1,57, 2,42) |
| North Korea | 89,51 (69,05, 111,14) | 4,44 (3,43, 5,51) | 269,72 (191,51, 352,35) | 12,53 (8,9, 16,37) | 3,91 (3,47, 4,36) |
| North Macedonia | 1,57 (1,12, 2,1) | 3,46 (2,47, 4,63) | 5,47 (3,82, 7,3) | 12,86 (9, 17,17) | 5,36 (4,83, 5,9) |
| Northern Mariana Islands | 189,66 (155,42, 224,64) | 4,47 (3,66, 5,29) | 235,89 (190,43, 284,37) | 4,41 (3,56, 5,32) | -0,22 (-0,61, 0,18) |
| Norway | 50,79 (33,18, 70,43) | 2,61 (1,71, 3,62) | 131,52 (92,18, 171,46) | 2,87 (2,01, 3,74) | 0,67 (0,22, 1,13) |
| Oman | 3858,22 (2460,98, 4959,13) | 3,42 (2,18, 4,39) | 14751,63 (11157,24, 18953,76) | 6,58 (4,98, 8,46) | 2,28 (2,14, 2,42) |
| Pakistan | 1,43 (0,97, 1,99) | 9,28 (6,29, 12,9) | 4,59 (3,05, 6,42) | 25,51 (16,95, 35,65) | 3,59 (3,53, 3,65) |
| Palau | 108,07 (78,5, 142,71) | 5,22 (3,79, 6,89) | 306,8 (232,74, 388,41) | 6,19 (4,7, 7,84) | 0,56 (-0,04, 1,17) |
| Palestine | 67,01 (51,83, 81,75) | 2,81 (2,17, 3,42) | 299,3 (214,19, 399,63) | 7,19 (5,15, 9,61) | 3,01 (2,71, 3,31) |
| Panama | 287,28 (195,36, 393,06) | 7,03 (4,78, 9,62) | 959,56 (654,79, 1308,97) | 9,73 (6,64, 13,27) | 1,01 (0,93, 1,1) |
| Papua New Guinea | 122,9 (96,2, 150,28) | 3,04 (2,38, 3,71) | 590,52 (424,82, 780,43) | 8,52 (6,13, 11,26) | 3,63 (3,18, 4,08) |
| Paraguay | 330,61 (245,11, 428,87) | 1,52 (1,13, 1,97) | 860,53 (557,86, 1238,55) | 2,53 (1,64, 3,64) | 1,93 (1,61, 2,25) |
| Peru | 1895,76 (1456,59, 2333,09) | 3 (2,3, 3,69) | 6166,9 (4441,88, 8146,09) | 5,5 (3,96, 7,26) | 2,07 (1,88, 2,25) |
| Philippines | 1784,73 (1505,04, 2049,07) | 4,68 (3,94, 5,37) | 2529,77 (1975,68, 3105,87) | 6,58 (5,14, 8,08) | 1,67 (1,17, 2,16) |
| Poland | 775,05 (611,66, 928,1) | 7,65 (6,03, 9,16) | 1328,63 (1051,36, 1589,32) | 12,47 (9,87, 14,92) | 1,22 (0,85, 1,59) |
| Portugal | 359,32 (271,6, 442,73) | 9,94 (7,52, 12,25) | 656,27 (447,88, 880,28) | 18,64 (12,72, 25) | 1,59 (1,34, 1,83) |
| Puerto Rico | 12,65 (9,09, 16,46) | 2,84 (2,04, 3,7) | 71,04 (46,04, 99,74) | 2,48 (1,61, 3,48) | -1,29 (-2,19, -0,38) |
| Qatar | 1188,67 (915,45, 1500,99) | 2,68 (2,06, 3,39) | 3578,62 (2822,64, 4382,22) | 6,7 (5,29, 8,21) | 2,43 (1,47, 3,39) |
| Romania | 91,91 (74,22, 108,88) | 2,07 (1,67, 2,45) | 83,76 (64,94, 104,82) | 2,27 (1,76, 2,84) | -0,68 (-1,1, -0,25) |
| Russia | 549,83 (443,59, 649,7) | 2,35 (1,9, 2,78) | 808,53 (626,98, 1021,97) | 4,2 (3,26, 5,31) | 2,25 (1,9, 2,6) |
| Rwanda | 3128,29 (2642,88, 3626,86) | 2,07 (1,75, 2,4) | 6299,55 (5035,78, 7631,35) | 4,29 (3,43, 5,2) | 1,91 (1,1, 2,73) |
| Saint Kitts and Nevis | 183,68 (114,92, 260,1) | 2,56 (1,6, 3,63) | 259,21 (161,18, 381,14) | 2,04 (1,27, 3) | -1,7 (-2,26, -1,13) |
| Saint Lucia | 7,21 (5,77, 8,66) | 17,44 (13,95, 20,94) | 8,79 (6,8, 10,99) | 14,76 (11,43, 18,46) | -0,81 (-1,12, -0,51) |
| Saint Vincent and the Grenadines | 16,07 (12,09, 19,65) | 11,7 (8,8, 14,3) | 30,33 (22,62, 38,88) | 17,37 (12,96, 22,27) | 0,61 (0,26, 0,96) |
| Samoa | 13,96 (10,68, 17,22) | 12,69 (9,71, 15,65) | 20,15 (14,33, 26,2) | 17,81 (12,66, 23,16) | 0,62 (0,31, 0,93) |
| San Marino | 12,52 (8,65, 17,12) | 7,65 (5,29, 10,46) | 26,04 (18,55, 35,05) | 12,32 (8,78, 16,58) | 1,64 (1,28, 2) |
| Sao Tome and Principe | 0,84 (0,65, 1,05) | 3,57 (2,76, 4,47) | 1,62 (1,07, 2,23) | 4,89 (3,23, 6,73) | 1,25 (1,12, 1,37) |
| Saudi Arabia | 1,29 (0,93, 1,67) | 1,07 (0,77, 1,37) | 2,23 (1,55, 2,91) | 1,09 (0,76, 1,42) | -0,18 (-0,31, -0,05) |
| Senegal | 245,21 (154,06, 347,06) | 1,53 (0,96, 2,16) | 642,02 (445,68, 876,45) | 1,8 (1,25, 2,45) | -0,27 (-0,68, 0,14) |
| Serbia | 228,03 (172,67, 290,65) | 2,99 (2,27, 3,81) | 637,15 (454,3, 830,38) | 4,21 (3, 5,49) | 1,26 (1,09, 1,43) |
| Seychelles | 540,64 (398,13, 683,89) | 5,75 (4,24, 7,28) | 896,81 (632,42, 1173,57) | 10,25 (7,23, 13,42) | 2,14 (1,88, 2,39) |
| Sierra Leone | 1,69 (1,27, 2,16) | 2,32 (1,74, 2,95) | 4,7 (3,48, 5,97) | 4,6 (3,41, 5,85) | 2,3 (2,16, 2,44) |
| Singapore | 112,97 (84,8, 144,31) | 3,09 (2,32, 3,95) | 258,42 (183,96, 350,26) | 3,12 (2,22, 4,23) | -0,26 (-0,42, -0,11) |
| Slovakia | 89,3 (67,96, 108,18) | 2,93 (2,23, 3,55) | 44,95 (34,73, 55,11) | 0,79 (0,61, 0,97) | -4,98 (-6,03, -3,92) |
| Slovenia | 245,71 (200,11, 293,01) | 4,65 (3,79, 5,55) | 266,36 (196,44, 343,09) | 4,9 (3,61, 6,31) | 0,34 (0,14, 0,55) |
| Solomon Islands | 86,87 (64,57, 112,42) | 4,41 (3,28, 5,7) | 120,35 (88,52, 159,02) | 5,8 (4,27, 7,67) | -1,24 (-2,15, -0,33) |
| Somalia | 22,9 (15,22, 34,22) | 6,73 (4,47, 10,05) | 82,26 (56,86, 111,66) | 12,55 (8,67, 17,03) | 2,08 (1,9, 2,27) |
| South Africa | 266,88 (183,83, 363,29) | 3,73 (2,57, 5,08) | 654,14 (459,09, 897,88) | 3,22 (2,26, 4,41) | -0,41 (-0,47, -0,35) |
| South Korea | 2142,82 (1663,91, 2630,95) | 5,82 (4,52, 7,14) | 7464,15 (6035,84, 8903,35) | 13,43 (10,86, 16,02) | 3,34 (2,92, 3,77) |
| South Sudan | 138,84 (93,93, 197,1) | 2,37 (1,6, 3,36) | 201,36 (128,71, 289,56) | 2,17 (1,39, 3,12) | -0,59 (-0,91, -0,26) |
| Spain | 3314,65 (2694,1, 3880,75) | 8,55 (6,95, 10,01) | 3452,73 (2729,62, 4188,85) | 7,5 (5,93, 9,1) | -0,97 (-1,17, -0,77) |
| Sri Lanka | 444,94 (333,24, 557,33) | 2,58 (1,94, 3,24) | 2388,71 (1588,27, 3264,25) | 10,93 (7,27, 14,94) | 5,88 (5,3, 6,46) |
| Sudan | 247,67 (168,76, 363,23) | 1,23 (0,84, 1,8) | 623,84 (388,78, 926,04) | 1,53 (0,95, 2,27) | 0,94 (0,73, 1,14) |
| Suriname | 19,66 (14,68, 24,36) | 5,08 (3,8, 6,3) | 55,39 (39,13, 72) | 9,62 (6,79, 12,5) | 2,1 (1,7, 2,5) |
| Sweden | 510,23 (422,36, 595,31) | 5,94 (4,92, 6,93) | 737,79 (595,2, 872,68) | 7,22 (5,82, 8,54) | 0,63 (0,36, 0,9) |
| Switzerland | 542,34 (450,41, 627,77) | 7,9 (6,56, 9,14) | 497,08 (405,06, 588,52) | 5,66 (4,62, 6,71) | -1,88 (-2,2, -1,57) |
| Syria | 172,76 (117,99, 234,1) | 1,34 (0,91, 1,82) | 337,96 (224,56, 465) | 2,33 (1,55, 3,21) | 1,15 (0,24, 2,06) |
| Taiwan (Province of China) | 1085,95 (834,6, 1316,58) | 5,32 (4,09, 6,45) | 2746,89 (1986,53, 3643,61) | 11,63 (8,41, 15,43) | 1,71 (1,13, 2,29) |
| Tajikistan | 109,12 (88,05, 130,85) | 2,03 (1,64, 2,43) | 478,56 (363,73, 618,62) | 5,04 (3,83, 6,52) | 3,28 (2,8, 3,76) |
| Tanzania | 1578,79 (1113,13, 2057,5) | 2,78 (1,96, 3,62) | 3283,52 (2120,22, 4525,99) | 4,68 (3,02, 6,46) | 1,03 (0,5, 1,56) |
| Thailand | 12,36 (8,68, 17,15) | 1,58 (1,11, 2,19) | 42,54 (30,35, 57,56) | 3,19 (2,27, 4,31) | 2,75 (2,59, 2,91) |
| Timor-Leste | 69,32 (53,13, 88,42) | 1,89 (1,45, 2,41) | 241,32 (172,47, 327,52) | 3,05 (2,18, 4,13) | 1,57 (1,44, 1,7) |
| Togo | 0,22 (0,15, 0,29) | 12,96 (9,13, 17,46) | 0,25 (0,17, 0,34) | 17,65 (11,83, 24,18) | 1,14 (0,79, 1,49) |
| Tokelau | 9,57 (7,04, 12,49) | 9,88 (7,28, 12,9) | 16,58 (11,45, 22,53) | 16,2 (11,19, 22,01) | 1,76 (1,57, 1,94) |
| Tonga | 237,71 (183,69, 285,88) | 19,76 (15,27, 23,76) | 431,55 (297,78, 582,75) | 31,1 (21,46, 42) | 1,02 (0,77, 1,28) |
| Trinidad and Tobago | 95,37 (64,95, 133,73) | 1,13 (0,77, 1,58) | 328,37 (210,62, 469,49) | 2,84 (1,82, 4,06) | 3,36 (3,24, 3,48) |
| Tunisia | 2441,75 (1731,55, 3178,45) | 4,09 (2,9, 5,32) | 3628,34 (2566,57, 4844,54) | 4,46 (3,15, 5,95) | 0,66 (0,3, 1,02) |
| Turkey | 70,79 (59,15, 81,69) | 1,91 (1,6, 2,2) | 268,05 (204,84, 350,73) | 5,27 (4,03, 6,9) | 2,96 (2,6, 3,33) |
| Turkmenistan | 1,3 (0,92, 1,74) | 13,92 (9,84, 18,65) | 2,36 (1,59, 3,42) | 19,98 (13,48, 28,99) | 1,07 (0,84, 1,3) |
| Tuvalu | 284,72 (180,59, 415,06) | 1,64 (1,04, 2,4) | 674,59 (435,24, 963,6) | 1,64 (1,06, 2,34) | -0,37 (-0,51, -0,23) |
| Uganda | 859,76 (710,67, 995,76) | 1,63 (1,35, 1,89) | 736,17 (554,39, 920,28) | 1,67 (1,26, 2,09) | -1,26 (-1,7, -0,81) |
| UK | 45,65 (32,81, 60,44) | 2,44 (1,75, 3,23) | 257,68 (161,41, 379,32) | 2,79 (1,75, 4,1) | -1,04 (-1,78, -0,29) |
| Ukraine | 2963,28 (2530,03, 3377,15) | 5,16 (4,4, 5,88) | 2363,06 (1978,51, 2768,39) | 3,52 (2,94, 4,12) | -1,61 (-1,83, -1,39) |
| United Arab Emirates | 659,46 (478,56, 846,72) | 2,55 (1,85, 3,27) | 1322,31 (913,16, 1794,28) | 2,33 (1,61, 3,16) | -0,47 (-0,56, -0,37) |
| Uruguay | 16574,2 (14104,42, 19041,39) | 6,54 (5,56, 7,51) | 28113,25 (23561,17, 32600,02) | 8,57 (7,18, 9,94) | 0,25 (-0,18, 0,69) |
| USA | 6,34 (4,57, 8,26) | 5,98 (4,31, 7,79) | 15,12 (10,81, 19,67) | 14,54 (10,39, 18,92) | 3,3 (3,07, 3,53) |
| Uzbekistan | 261,96 (223, 299,19) | 8,34 (7,1, 9,53) | 336,51 (279,92, 390,91) | 9,79 (8,15, 11,38) | 0,63 (0,46, 0,81) |
| Vanuatu | 352,79 (293,85, 413,52) | 1,68 (1,4, 1,97) | 2455,21 (1900,62, 3088,82) | 7,29 (5,64, 9,17) | 4,49 (4,01, 4,97) |
| Venezuela | 5,45 (3,44, 8,54) | 3,6 (2,27, 5,64) | 25,79 (16,81, 36,68) | 8,76 (5,71, 12,45) | 3,33 (3,15, 3,51) |
| Vietnam | 674,41 (523,54, 834,71) | 3,58 (2,78, 4,43) | 2545,47 (1757,1, 3425,23) | 9,07 (6,26, 12,2) | 2,92 (2,58, 3,27) |
| Virgin Islands US | 2856,47 (2047,92, 3712,64) | 4,2 (3,01, 5,46) | 6336,05 (4507,98, 8404,14) | 6,57 (4,68, 8,72) | 1,74 (1,47, 2) |
| Yemen | 135,04 (88,57, 206,73) | 0,98 (0,65, 1,51) | 461,41 (309,69, 667,83) | 1,46 (0,98, 2,12) | 1,53 (1,32, 1,73) |
| Zambia | 249,07 (188,53, 317,04) | 3,14 (2,37, 3,99) | 570,14 (420,25, 752,3) | 3,13 (2,3, 4,12) | -0,52 (-0,79, -0,26) |
| Zimbabwe | 281,44 (222,21, 346,94) | 2,72 (2,15, 3,36) | 786,48 (559,75, 1047,85) | 5,24 (3,73, 6,98) | 2,68 (2,29, 3,07) |
| *No., number; ASMR, age-standardized mortality rate; UI, uncertainty interval; EAPC, estimated annual percentage change; CI, confidence interval.* | | | | | |

**Table S4.** The number of cases and ASR of DALYs attributable to diet-related T2DM in 204 countries and territories in 1990 and 2019 and the change of DALYs between 1990 and 2019

| **Country** | **1990** |  | **2019** |  | **1990-2019** |
| --- | --- | --- | --- | --- | --- |
|  | **DALYs** | **ASDR per 100,000** | **DALYs** | **ASDR per 100,000** | **EAPC in ASDR** |
|  | **No. (95% *UI*)** | **No. (95% *UI*)** | **No. (95% *UI*)** | **No. (95% *UI*)** | **No. (95% *CI*)** |
| Afghanistan | 21575,11 (14617,37, 30956,11) | 188,94 (128,01, 271,1) | 63359,55 (43164,6, 88202,98) | 165,53 (112,77, 230,43) | 0,85 (-1,84, 3,63) |
| Albania | 2135,7 (1535,35, 2923,12) | 64,52 (46,39, 88,31) | 5502,67 (3774,96, 7603,94) | 202,28 (138,77, 279,52) | 2,82 (-0,42, 6,17) |
| Algeria | 20374,13 (13970,99, 27730,58) | 80,59 (55,26, 109,68) | 70729,92 (45591,18, 98396,07) | 169,02 (108,95, 235,13) | 4,98 (1,64, 8,42) |
| American Samoa | 143,27 (101,54, 189,21) | 295,82 (209,65, 390,69) | 391,42 (276,22, 519,21) | 705,2 (497,66, 935,42) | -1,27 (-4,61, 2,18) |
| Andorra | 59,8 (43,25, 80,02) | 110,55 (79,95, 147,93) | 201,08 (141,06, 276,14) | 242,08 (169,82, 332,44) | 0,3 (-2,52, 3,21) |
| Angola | 14336,51 (10344,21, 18883,99) | 138,94 (100,25, 183,01) | 35932,93 (25468,79, 48494,12) | 119,23 (84,51, 160,9) | -0,11 (-2,78, 2,62) |
| Antigua and Barbuda | 233,04 (178,11, 289,2) | 383,77 (293,32, 476,26) | 487,49 (358,14, 629,36) | 550,9 (404,73, 711,22) | 1,28 (-1,45, 4,09) |
| Argentina | 79678,51 (64109,19, 95428,92) | 240,57 (193,56, 288,12) | 151864,41 (118240,11, 190976,01) | 336,61 (262,08, 423,31) | 1,06 (-1,61, 3,8) |
| Armenia | 5808,89 (4458,64, 7307,95) | 170,12 (130,58, 214,02) | 12898,77 (9392,47, 16428,91) | 427,16 (311,04, 544,06) | 3,58 (-0,02, 7,31) |
| Australia | 28173,96 (22422,36, 34888,49) | 167,1 (132,99, 206,93) | 67448,47 (50157, 87786,42) | 274,54 (204,15, 357,32) | 0,62 (-2,74, 4,09) |
| Austria | 15377,82 (12057,33, 18940,12) | 197,95 (155,21, 243,81) | 28194,55 (21025,63, 36817,25) | 316,22 (235,81, 412,93) | 1,88 (-0,57, 4,38) |
| Azerbaijan | 8284,69 (6210,1, 10509,4) | 113,01 (84,71, 143,36) | 30723,7 (22284,86, 39950,47) | 298,91 (216,81, 388,67) | -0,19 (-3,12, 2,83) |
| Bahamas | 682,57 (521,16, 859,26) | 266,15 (203,21, 335,04) | 1675,13 (1241,85, 2213,94) | 444,4 (329,46, 587,35) | 2,35 (-1,04, 5,86) |
| Bahrain | 755,14 (527,41, 996,36) | 148,64 (103,81, 196,12) | 6315,18 (4230,65, 8576,02) | 437,74 (293,25, 594,45) | 0,6 (-2,41, 3,72) |
| Bangladesh | 116496,5 (90608,54, 143633,33) | 106,82 (83,09, 131,71) | 328006,11 (246601,12, 420547,73) | 205,96 (154,84, 264,06) | 3,24 (0,02, 6,56) |
| Barbados | 1502,91 (1186,02, 1847,94) | 591,94 (467,13, 727,83) | 2243,81 (1641,89, 2886) | 753,54 (551,39, 969,2) | 2,6 (-0,87, 6,19) |
| Belarus | 15828,03 (11734,9, 20593,67) | 151,17 (112,08, 196,68) | 15974,57 (10862,41, 22124,48) | 168,14 (114,33, 232,87) | 0,61 (-2,29, 3,59) |
| Belgium | 22223,09 (16760,12, 28635,53) | 222,69 (167,94, 286,94) | 36613,57 (25793,46, 49606,18) | 320,63 (225,88, 434,41) | 0,36 (-2,76, 3,59) |
| Belize | 193,76 (134,49, 254,6) | 104,24 (72,35, 136,96) | 878,39 (602,28, 1184,55) | 214,19 (146,86, 288,85) | 0,26 (-2,82, 3,44) |
| Benin | 3886,12 (2907,29, 4848,13) | 80,08 (59,91, 99,91) | 12425,07 (8897,09, 16331,83) | 98,1 (70,25, 128,94) | -0,26 (-3,35, 2,93) |
| Bermuda | 147,75 (111,6, 187,47) | 248,51 (187,71, 315,32) | 283,87 (210,81, 367,33) | 443,34 (329,23, 573,69) | 2,22 (-0,89, 5,42) |
| Bhutan | 479,56 (346,11, 616,98) | 78,34 (56,54, 100,79) | 1524,96 (1097,65, 2004,83) | 202,18 (145,53, 265,8) | 0,16 (-2,36, 2,74) |
| Bolivia | 8636,66 (6125,43, 11488,12) | 134,51 (95,4, 178,91) | 27953,09 (20186,88, 36677,91) | 232,71 (168,06, 305,35) | 0,86 (-2,83, 4,7) |
| Bosnia and Herzegovina | 6897,61 (4934,07, 8966,6) | 152 (108,73, 197,59) | 20091,3 (14254,66, 26515,96) | 608,83 (431,96, 803,52) | -0,12 (-3,15, 3,02) |
| Botswana | 2558,81 (1880,02, 3342,15) | 196,58 (144,43, 256,76) | 9443,92 (6595,66, 12589,48) | 403,81 (282,02, 538,31) | -0,54 (-3,81, 2,85) |
| Brazil | 262094,79 (203992,76, 330653,2) | 176,1 (137,06, 222,16) | 695189,88 (540328,12, 862618,26) | 320,86 (249,38, 398,13) | 3,16 (-0,92, 7,4) |
| Brunei | 868,19 (661,33, 1084,2) | 335,8 (255,79, 419,36) | 2204,25 (1664,4, 2823,21) | 504,27 (380,77, 645,87) | 2,1 (-1,15, 5,45) |
| Bulgaria | 28268,74 (21525,02, 35653,8) | 325,63 (247,95, 410,7) | 38066,97 (28367,03, 48885,19) | 548,94 (409,06, 704,94) | 2,13 (-1,09, 5,46) |
| Burkina Faso | 11704,11 (8963,08, 14717,43) | 122,46 (93,78, 153,99) | 28453,98 (21379,66, 36009,27) | 125,39 (94,22, 158,69) | 2,17 (-0,65, 5,08) |
| Burundi | 4887,81 (3254,52, 7180,67) | 87,74 (58,42, 128,9) | 8151,01 (5336,45, 11148,61) | 68,3 (44,71, 93,42) | -0,29 (-2,79, 2,27) |
| Cambodia | 259,89 (191,02, 340,06) | 73,92 (54,33, 96,71) | 1146,44 (841,3, 1488,49) | 203,43 (149,28, 264,12) | 1,03 (-1,57, 3,7) |
| Cameroon | 12017,88 (8747,92, 15727,91) | 115,83 (84,31, 151,59) | 34939,74 (25673,79, 46333) | 210,44 (154,63, 279,06) | 1,02 (-2,45, 4,61) |
| Canada | 8532,37 (6024,44, 11435,35) | 82,11 (57,98, 110,05) | 32592,17 (22322,98, 44889,48) | 111,99 (76,71, 154,25) | -0,31 (-2,77, 2,21) |
| Cape Verde | 35487,88 (28271,69, 43456,2) | 130,2 (103,72, 159,43) | 89149,76 (66729,86, 116910,25) | 244,11 (182,72, 320,13) | -0,72 (-4,15, 2,83) |
| Central African Republic | 4711,72 (3501,28, 6166,45) | 171,71 (127,6, 224,72) | 10563,41 (7593,56, 14049,33) | 199,31 (143,28, 265,09) | 1,67 (-1,59, 5,03) |
| Chad | 6709,29 (5190,66, 8396,78) | 111,41 (86,19, 139,43) | 18861,68 (14089,82, 24110,68) | 115,02 (85,92, 147,03) | -0,82 (-3,89, 2,36) |
| Chile | 21442,17 (16756,47, 27237,76) | 161,46 (126,18, 205,1) | 68079,95 (50339,96, 88758,87) | 374,1 (276,62, 487,73) | 3,97 (1,45, 6,56) |
| China | 1048787,03 (769115,04, 1372981,87) | 88,6 (64,98, 115,99) | 2522819,68 (1817116,69, 3372078,52) | 177,37 (127,75, 237,08) | -0,53 (-4,16, 3,25) |
| Colombia | 40741,48 (28262,13, 54143,47) | 125,18 (86,83, 166,35) | 113369,18 (77114,26, 158733,58) | 237,29 (161,41, 332,24) | 1,13 (-1,84, 4,19) |
| Comoros | 385,91 (227,59, 541,21) | 82,86 (48,86, 116,2) | 924,37 (635,48, 1262,07) | 129,4 (88,96, 176,67) | 1,01 (-2,68, 4,85) |
| Congo | 4336,25 (3173,36, 5557,19) | 177,37 (129,8, 227,31) | 10475,2 (7463,3, 13819,77) | 198,93 (141,73, 262,44) | 0,2 (-2,99, 3,5) |
| Cook Islands | 86,11 (61,41, 113,78) | 452,71 (322,84, 598,17) | 167,32 (121,1, 220,84) | 930,25 (673,28, 1227,81) | -0,17 (-3,03, 2,79) |
| Costa Rica | 3593,28 (2447,15, 4838,16) | 118,2 (80,5, 159,15) | 11481,66 (7697,99, 15959,41) | 243,42 (163,21, 338,36) | 0,91 (-2,37, 4,31) |
| Cote d'Ivoire | 8254,22 (5971,89, 10880,8) | 67,51 (48,84, 88,99) | 27971,85 (19695,03, 37024,94) | 106,88 (75,25, 141,47) | 0 (-3,71, 3,86) |
| Croatia | 9183,01 (6295,08, 12344,26) | 187,38 (128,45, 251,89) | 15200,9 (10281,69, 20825,13) | 357,84 (242,04, 490,25) | -0,02 (-3,18, 3,24) |
| Cuba | 24799,71 (17445,51, 32945,36) | 228,94 (161,05, 304,14) | 34216,6 (22352,63, 48755,24) | 301,24 (196,79, 429,24) | 3,79 (0,3, 7,39) |
| Cyprus | 3180,31 (2475,98, 3979,17) | 408,78 (318,25, 511,46) | 4850,31 (3606,25, 6247,46) | 369,27 (274,56, 475,64) | -1,53 (-3,75, 0,74) |
| Czech | 31655,12 (23318,35, 41612,13) | 307,41 (226,45, 404,1) | 70063,13 (49644,82, 94377,08) | 658,27 (466,43, 886,71) | 4,14 (1, 7,38) |
| Denmark | 19748,51 (13532,62, 26685,91) | 93,8 (64,27, 126,74) | 45367,75 (31607,75, 61146,37) | 172,94 (120,49, 233,09) | -0,04 (-3,01, 3,02) |
| Djibouti | 34864,22 (24320,87, 46370,57) | 90,34 (63,02, 120,16) | 100489,21 (70529,05, 132376,32) | 114,62 (80,45, 150,99) | 1,64 (-1,62, 5,01) |
| Dominica | 9046,37 (7370,09, 10937,8) | 175,85 (143,27, 212,62) | 16346,03 (12743,16, 20739,33) | 281,7 (219,61, 357,41) | 0,92 (-2,51, 4,47) |
| Dominican Republic | 434,22 (313,95, 572,81) | 89,34 (64,6, 117,86) | 2158,27 (1536,06, 2865,93) | 179,44 (127,71, 238,27) | -0,23 (-3,47, 3,12) |
| DR Congo | 268,36 (195,87, 337,53) | 362,63 (264,67, 456,09) | 399,28 (283,07, 521,58) | 581,34 (412,14, 759,42) | -0,42 (-3,98, 3,27) |
| Ecuador | 5290,7 (3670,76, 6944,28) | 73,45 (50,96, 96,41) | 20175,88 (13737,02, 27599,29) | 185,41 (126,24, 253,63) | 3,91 (0,96, 6,95) |
| Egypt | 9206,47 (6536,16, 11887,73) | 91,82 (65,19, 118,57) | 44952,35 (31504,98, 58800,57) | 255,58 (179,12, 334,31) | 5,29 (2,43, 8,24) |
| El Salvador | 39388,07 (26847,69, 52467,14) | 70,72 (48,2, 94,2) | 146434,77 (95225,12, 204084,13) | 147,81 (96,12, 206) | -0,19 (-3,28, 3) |
| Equatorial Guinea | 4463,59 (3108,52, 5862,44) | 84,74 (59,01, 111,29) | 17300,24 (12033,58, 23472,59) | 276,53 (192,35, 375,19) | 1,93 (-1,14, 5,08) |
| Eritrea | 680,7 (483,91, 905) | 158,18 (112,45, 210,3) | 1636,72 (1079,55, 2308,91) | 115,28 (76,03, 162,62) | -0,97 (-3,82, 1,96) |
| Estonia | 2857,44 (1967,58, 3984,71) | 95,2 (65,56, 132,76) | 8253,37 (5634,74, 11282,2) | 122,98 (83,96, 168,11) | 0,99 (-1,83, 3,89) |
| Eswatini | 2260,67 (1613,97, 3047,24) | 144,11 (102,89, 194,25) | 3554,76 (2471,22, 4900,84) | 270,87 (188,3, 373,44) | 3,55 (0,35, 6,86) |
| Ethiopia | 1608,21 (1187,76, 2066,82) | 199,36 (147,24, 256,21) | 4713,88 (3260,16, 6473,5) | 412,73 (285,45, 566,8) | 1,36 (-1,36, 4,15) |
| Fiji | 90833,62 (67845,84, 118676,7) | 176,75 (132,02, 230,93) | 99079,89 (75431,54, 122171,45) | 92,09 (70,11, 113,55) | 2,1 (-1,36, 5,69) |
| Finland | 4842,15 (3664,47, 6201,91) | 637,68 (482,59, 816,76) | 13925,03 (10250,26, 18082,21) | 1528,13 (1124,86, 1984,33) | 3,43 (0,38, 6,58) |
| France | 9893,77 (7329,39, 12891,64) | 197,47 (146,29, 257,31) | 18781,72 (12657,55, 25998,5) | 339,38 (228,72, 469,79) | 0,18 (-3,13, 3,61) |
| Gabon | 74548,6 (59721,53, 90559,56) | 129,04 (103,38, 156,76) | 145201,2 (112360,75, 183824,45) | 219,32 (169,72, 277,66) | 1,93 (-1,32, 5,29) |
| Gambia | 2435,16 (1770,39, 3234,21) | 245,59 (178,55, 326,18) | 4639,96 (3361,78, 6172,47) | 265,13 (192,1, 352,7) | 1,92 (-0,63, 4,55) |
| Georgia | 702,34 (509,15, 890,65) | 70,8 (51,33, 89,79) | 2747,76 (2042,3, 3511,08) | 122,35 (90,94, 156,34) | 2 (-1,28, 5,39) |
| Germany | 9352,87 (6943,12, 12075,24) | 169,79 (126,04, 219,21) | 18763,46 (13788,91, 24350,82) | 512 (376,26, 664,46) | 3,96 (1,26, 6,72) |
| Ghana | 262613,1 (204016,8, 336338,88) | 328,51 (255,21, 420,73) | 400132,61 (291647,84, 533485,47) | 471,22 (343,46, 628,27) | 1,06 (-2,25, 4,49) |
| Greece | 11790,58 (8569,09, 15465,03) | 78,52 (57,06, 102,99) | 39077,58 (27165,87, 51832,83) | 123,91 (86,14, 164,36) | 2,58 (-0,11, 5,35) |
| Greenland | 16950,58 (12460,55, 22152,19) | 163,15 (119,93, 213,22) | 32434,86 (22863,11, 43596,58) | 313,77 (221,17, 421,75) | 4,46 (1,22, 7,8) |
| Grenada | 61,28 (48,9, 75,98) | 110,25 (87,99, 136,7) | 129,98 (96,13, 169,38) | 231,32 (171,08, 301,45) | -1,06 (-4, 1,98) |
| Guam | 283,62 (208,04, 361,86) | 331,05 (242,83, 422,37) | 529,84 (376,78, 703,53) | 513,33 (365,04, 681,62) | 1,09 (-1,87, 4,14) |
| Guatemala | 217,97 (158,82, 287,87) | 159,38 (116,13, 210,49) | 516,95 (371,25, 689,28) | 302,97 (217,58, 403,96) | 0,1 (-2,18, 2,44) |
| Guinea | 6074,72 (4184,52, 8000,95) | 76,25 (52,53, 100,43) | 51170,52 (35907,42, 67972,84) | 287,86 (201,99, 382,37) | -0,78 (-4,28, 2,85) |
| Guinea-Bissau | 5100,18 (3609,48, 6649,74) | 82,44 (58,35, 107,49) | 12674,96 (8948,16, 17072,5) | 100,25 (70,77, 135,03) | 0,7 (-1,83, 3,31) |
| Guyana | 1310,81 (960,9, 1715,3) | 130,13 (95,39, 170,28) | 2757,79 (2018,89, 3681,49) | 145,06 (106,19, 193,64) | 0,15 (-2,94, 3,34) |
| Haiti | 2275,02 (1684,22, 2872,95) | 295,43 (218,71, 373,08) | 4468,53 (3149,33, 5813,57) | 579,8 (408,63, 754,32) | 0,38 (-2,67, 3,53) |
| Honduras | 14550,18 (9797,69, 20042,53) | 228,93 (154,16, 315,35) | 34030,03 (22410,86, 47884,28) | 274,39 (180,7, 386,1) | 3,8 (0,07, 7,67) |
| Hungary | 3644,71 (2421,24, 5099,36) | 77,41 (51,42, 108,3) | 16501,07 (11039,67, 23491,24) | 168,13 (112,48, 239,35) | 4,02 (1,06, 7,07) |
| Iceland | 27724,27 (20530,18, 36042,76) | 266,77 (197,55, 346,81) | 47475,22 (33880,32, 62569,25) | 490,73 (350,21, 646,75) | 3,15 (-0,11, 6,51) |
| India | 288,42 (214,6, 377,83) | 113,56 (84,5, 148,77) | 779,75 (540,85, 1069,4) | 226,1 (156,82, 310,08) | 2,2 (-0,43, 4,91) |
| Indonesia | 843594,71 (641616,83, 1070768,77) | 98,6 (74,99, 125,15) | 2941701,85 (2244263,26, 3721471,65) | 211,53 (161,38, 267,6) | 3,66 (0,99, 6,41) |
| Iran | 242348,91 (186562,71, 297740,24) | 130,73 (100,64, 160,61) | 673088,88 (482992,69, 860729,78) | 259,41 (186,15, 331,73) | 1,16 (-2,06, 4,5) |
| Iraq | 31002,68 (21821,55, 40668,1) | 52,96 (37,28, 69,47) | 148383,48 (106536,78, 195068,44) | 176,02 (126,38, 231,4) | 1,7 (-1,48, 4,98) |
| Ireland | 25919,69 (18154,74, 34546,67) | 147,3 (103,17, 196,33) | 91036,14 (64438,62, 120950,21) | 216,14 (152,99, 287,16) | 2,13 (-0,72, 5,06) |
| Israel | 4389,94 (3536,92, 5274,82) | 121,9 (98,21, 146,47) | 11122,72 (7914,26, 15054,37) | 226,52 (161,17, 306,58) | -1,98 (-5,08, 1,22) |
| Italy | 6332,1 (4739,67, 8051,49) | 127,62 (95,52, 162,27) | 22448,98 (16767,41, 29040,28) | 241,14 (180,11, 311,94) | 2,71 (-0,89, 6,43) |
| Jamaica | 188423,86 (151577,48, 228691,98) | 331,74 (266,87, 402,64) | 282309,02 (213308,74, 359638,04) | 468,07 (353,67, 596,28) | 2,7 (-1,03, 6,58) |
| Japan | 5666,53 (3958,48, 7318,8) | 239,73 (167,47, 309,63) | 13148,13 (9174,15, 17550,22) | 467,78 (326,39, 624,4) | 0,89 (-2,7, 4,6) |
| Jordan | 173835,45 (126469,52, 227539,4) | 138,11 (100,48, 180,78) | 279792,07 (191660,83, 388757,31) | 218,95 (149,98, 304,22) | 1,87 (-1,86, 5,75) |
| Kazakhstan | 5204,33 (3816,92, 6682,99) | 137,93 (101,16, 177,12) | 21502,08 (15356,91, 28119,33) | 184,78 (131,97, 241,64) | 1,85 (-1,02, 4,81) |
| Kenya | 26256,5 (19295,4, 34043,2) | 160,42 (117,89, 207,99) | 61379,35 (45109,2, 79995,55) | 333,73 (245,26, 434,95) | 2,02 (-0,83, 4,95) |
| Kiribati | 14984,26 (11327,55, 18768) | 64,61 (48,84, 80,92) | 50556,06 (37114,89, 65024,43) | 100,65 (73,89, 129,46) | -0,87 (-3,76, 2,1) |
| Kuwait | 396,25 (284,11, 519,68) | 535 (383,6, 701,66) | 991,15 (665,13, 1367,61) | 835,56 (560,72, 1152,92) | 2,35 (-1,01, 5,82) |
| Kyrgyzstan | 1867,83 (1299,24, 2500,69) | 106,16 (73,84, 142,13) | 9320,86 (6228,77, 13458,47) | 210,57 (140,71, 304,04) | 2,13 (-0,99, 5,36) |
| Laos | 4233,23 (3231,84, 5350,76) | 94,87 (72,43, 119,91) | 8258,51 (5984,86, 10816,92) | 126,36 (91,58, 165,51) | 1,32 (-1,77, 4,5) |
| Latvia | 7003,47 (4973,88, 9490,04) | 168,69 (119,81, 228,59) | 13203,39 (8972,06, 17804,87) | 184,45 (125,34, 248,73) | 0,09 (-2,59, 2,85) |
| Lebanon | 4560,2 (3357,95, 6052,45) | 171,52 (126,3, 227,65) | 6613,82 (4684,65, 8819,23) | 345,32 (244,59, 460,46) | -3,2 (-6,4, 0,11) |
| Lesotho | 3553,39 (2466,13, 4835,87) | 108,5 (75,3, 147,66) | 10812,39 (7257,39, 15237,93) | 208,85 (140,18, 294,34) | 2,55 (-0,11, 5,28) |
| Liberia | 3173,64 (2313,26, 4075,43) | 175,61 (128, 225,51) | 8964,55 (6073,61, 12347,27) | 428,6 (290,38, 590,33) | 1,69 (-1,19, 4,66) |
| Libya | 2452,79 (1772,74, 3136,85) | 124,87 (90,25, 159,7) | 6390,76 (4581,31, 8393,55) | 133,42 (95,65, 175,23) | -0,15 (-3,32, 3,13) |
| Lithuania | 3030,14 (2063,52, 4070,21) | 71,52 (48,7, 96,07) | 13846,7 (9028,9, 19526,56) | 205,58 (134,05, 289,9) | 1 (-2,11, 4,21) |
| Luxembourg | 4912,14 (3529,42, 6576,29) | 133,72 (96,08, 179,02) | 6573,63 (4573,87, 9004,04) | 235,26 (163,69, 322,24) | 0,22 (-2,52, 3,05) |
| Madagascar | 659,31 (526,93, 816,76) | 172,93 (138,21, 214,23) | 2237,98 (1573,05, 3083,91) | 361,81 (254,31, 498,57) | 0,89 (-2,47, 4,36) |
| Malawi | 11314,23 (8300,82, 14584,63) | 94,67 (69,45, 122,03) | 26033,36 (18664,45, 34663,39) | 97,54 (69,93, 129,87) | 0,37 (-2,74, 3,58) |
| Malaysia | 8147,67 (5860,59, 10385,37) | 85,27 (61,33, 108,68) | 15987,09 (11217,74, 21302,4) | 86,69 (60,83, 115,51) | -1,43 (-3,99, 1,21) |
| Maldives | 21999,56 (16361,9, 28363,98) | 124,61 (92,68, 160,66) | 47661,05 (31533,1, 67023,84) | 152,26 (100,74, 214,12) | 1,89 (-1,5, 5,39) |
| Mali | 203,43 (143,67, 270,36) | 91,67 (64,74, 121,83) | 560,5 (389,11, 749,93) | 112,46 (78,07, 150,46) | 1,56 (-1,26, 4,46) |
| Malta | 9823,06 (7379,06, 12333,62) | 113,26 (85,08, 142,21) | 24572,06 (17793,93, 31312,82) | 112,11 (81,19, 142,87) | 2,5 (-0,15, 5,22) |
| Marshall Islands | 1193,68 (943,9, 1496,03) | 322,02 (254,63, 403,58) | 2172,51 (1590,8, 2864,9) | 494,63 (362,19, 652,27) | 0,29 (-3,32, 4,02) |
| Mauritania | 112,83 (80,99, 147,24) | 246,74 (177,12, 321,99) | 369,25 (258,01, 493,84) | 649,61 (453,9, 868,79) | -0,27 (-3,57, 3,13) |
| Mauritius | 2870,18 (2220,61, 3547,51) | 138,9 (107,46, 171,68) | 5804,58 (4299,28, 7482,54) | 144,6 (107,1, 186,4) | 2 (-0,94, 5,04) |
| Mexico | 3249,75 (2506,38, 3941,59) | 295,41 (227,84, 358,3) | 14033 (10226,73, 18003,55) | 1099,19 (801,05, 1410,2) | -0,83 (-3,72, 2,15) |
| Micronesia | 245300,1 (190169,13, 304561,88) | 286,94 (222,45, 356,26) | 702121,07 (534786,19, 897452,35) | 561,97 (428,03, 718,31) | 2,73 (-0,81, 6,4) |
| Moldova | 305,04 (209,34, 412,97) | 292,51 (200,74, 396,01) | 830,22 (536,94, 1175,87) | 813,02 (525,81, 1151,51) | 2,55 (-0,37, 5,57) |
| Monaco | 51,75 (37,07, 69,7) | 170,01 (121,79, 228,96) | 116,82 (80,33, 163,73) | 310,93 (213,8, 435,79) | 0,25 (-2,91, 3,5) |
| Mongolia | 1177,86 (888,93, 1507,78) | 54,69 (41,27, 70,01) | 4013,69 (2928,7, 5320,41) | 118,48 (86,45, 157,06) | -0,86 (-4,18, 2,58) |
| Montenegro | 1220,43 (875,44, 1627,17) | 195,04 (139,91, 260,04) | 2624,93 (1865,84, 3537,79) | 423,14 (300,78, 570,3) | 1,36 (-1,56, 4,37) |
| Morocco | 16952,8 (11706,4, 23051,24) | 67,02 (46,28, 91,12) | 64319,48 (42506,44, 88047,64) | 178,9 (118,23, 244,9) | 0,34 (-2,66, 3,44) |
| Mozambique | 15138,84 (11351,37, 19071,77) | 115,82 (86,84, 145,91) | 36227,82 (25662,52, 47606,48) | 122,69 (86,91, 161,22) | -1,47 (-4,33, 1,47) |
| Myanmar | 99544,7 (72369,31, 131946,89) | 242,18 (176,06, 321,01) | 173114,9 (126432,82, 223206,36) | 316,61 (231,24, 408,23) | 1,99 (-0,99, 5,05) |
| Namibia | 3312,61 (2542,76, 4132,91) | 234,99 (180,38, 293,18) | 6580,2 (4877,76, 8467,88) | 273,82 (202,98, 352,37) | -1,99 (-5,24, 1,37) |
| Nauru | 29,55 (20,2, 41,66) | 288,13 (196,97, 406,24) | 51,71 (34,83, 76,29) | 490,09 (330,09, 723,03) | -0,62 (-3,32, 2,16) |
| Nepal | 13795,31 (10038,54, 18099,51) | 70,61 (51,38, 92,64) | 48032,79 (33846,46, 63485,98) | 157,92 (111,28, 208,72) | 2,72 (0,04, 5,47) |
| Netherlands | 35413,61 (28153,35, 43397,53) | 237,3 (188,65, 290,8) | 47663,27 (35349,43, 62492) | 277,81 (206,04, 364,24) | 0,99 (-2,8, 4,93) |
| New Zealand | 5038,48 (4030,19, 6168,3) | 147,44 (117,93, 180,5) | 10703,92 (8246,24, 13751,22) | 238,09 (183,43, 305,88) | 2,33 (-0,96, 5,73) |
| Nicaragua | 4375,17 (3247,31, 5625,73) | 112,56 (83,54, 144,73) | 18706,02 (13544,02, 24386,02) | 287,33 (208,04, 374,57) | 1,21 (-1,83, 4,34) |
| Niger | 5413,49 (4093,49, 7002,75) | 67,48 (51,02, 87,28) | 18257,53 (13534,63, 23558,82) | 78,37 (58,1, 101,13) | 3,05 (-0,43, 6,66) |
| Nigeria | 82076,56 (61170,22, 104795,63) | 91,01 (67,83, 116,2) | 168085,62 (122144,59, 220912,99) | 78,24 (56,86, 102,83) | 3,64 (0,15, 7,25) |
| Niue | 11,79 (8,3, 15,73) | 506,58 (356,9, 676,19) | 17,23 (11,81, 23,38) | 1030,6 (706,81, 1398,41) | 0,57 (-2,54, 3,78) |
| North Korea | 3997,62 (2910,49, 5216,3) | 198,35 (144,41, 258,82) | 11273,53 (8124,44, 14835,93) | 523,69 (377,4, 689,17) | 2,38 (-0,54, 5,39) |
| North Macedonia | 78,48 (56,34, 103,03) | 172,87 (124,11, 226,95) | 248,59 (173,47, 333,13) | 585 (408,22, 783,94) | 2,78 (-0,52, 6,2) |
| Northern Mariana Islands | 9097,78 (6866,56, 11814,32) | 214,22 (161,68, 278,19) | 14911,24 (10767,07, 19947,7) | 278,77 (201,3, 372,93) | 1,22 (-1,32, 3,83) |
| Norway | 1890,74 (1258,02, 2510,59) | 97,3 (64,74, 129,2) | 6274,35 (4336,12, 8353,08) | 136,88 (94,59, 182,22) | 3,96 (0,81, 7,22) |
| Oman | 155942,88 (114603,61, 198025,73) | 138,2 (101,57, 175,5) | 603331,6 (461821,21, 776479,08) | 269,27 (206,11, 346,55) | -0,25 (-3,07, 2,66) |
| Pakistan | 51,04 (35,09, 68,98) | 331,32 (227,78, 447,82) | 179,82 (121,2, 246,54) | 998,59 (673,04, 1369,09) | 3,5 (0,06, 7,06) |
| Palau | 3147,16 (2297,33, 4121,7) | 152,03 (110,98, 199,11) | 10822,1 (8072,02, 13923,9) | 218,34 (162,85, 280,92) | -0,77 (-3,71, 2,26) |
| Palestine | 3199,61 (2341,65, 4204,86) | 133,96 (98,04, 176,05) | 13767,52 (9855,29, 18128,5) | 330,91 (236,88, 435,73) | 2,23 (-1,17, 5,75) |
| Panama | 10902,07 (7563,09, 14682,26) | 266,72 (185,03, 359,2) | 39317,34 (26822,45, 52332,77) | 398,49 (271,85, 530,4) | 3,9 (0,59, 7,32) |
| Papua New Guinea | 4514,94 (3455,49, 5651,21) | 111,6 (85,42, 139,69) | 19797,59 (14668,95, 25633,95) | 285,66 (211,66, 369,87) | 3 (0,23, 5,84) |
| Paraguay | 13064,55 (9430,25, 16980,58) | 60,12 (43,4, 78,14) | 37469,76 (25229,85, 52188,94) | 110,22 (74,22, 153,52) | 2,48 (0,05, 4,98) |
| Peru | 73047,11 (55337,09, 91442,61) | 115,42 (87,44, 144,48) | 236746,13 (175185,38, 301246,42) | 211,11 (156,22, 268,63) | -0,5 (-3,82, 2,93) |
| Philippines | 95392,23 (74480,73, 120105,91) | 249,99 (195,19, 314,76) | 161893,46 (117793,99, 210903,85) | 421,22 (306,48, 548,74) | -1,4 (-4,7, 2,02) |
| Poland | 26059,57 (19314,61, 33023,34) | 257,07 (190,53, 325,77) | 50896,82 (37470,33, 66135,32) | 477,85 (351,79, 620,92) | 4,11 (0,52, 7,83) |
| Portugal | 12476 (9220,47, 16163,56) | 345,28 (255,18, 447,33) | 23096,23 (15976,89, 30827,98) | 655,88 (453,7, 875,44) | 0,11 (-2,29, 2,57) |
| Puerto Rico | 555,66 (383,39, 746,63) | 124,83 (86,13, 167,73) | 6560,45 (4397,3, 9197,1) | 229,02 (153,51, 321,07) | -0,54 (-3,08, 2,07) |
| Qatar | 53811,76 (39834,19, 68592,34) | 121,37 (89,84, 154,7) | 155731,96 (113871,92, 203556,95) | 291,64 (213,25, 381,21) | 1,73 (-1,71, 5,3) |
| Romania | 6474,54 (4624,84, 8535,81) | 145,61 (104,01, 191,97) | 8512,71 (5761,1, 11654,25) | 230,81 (156,2, 315,99) | 0,43 (-2,86, 3,84) |
| Russia | 33968,75 (24553,36, 44269,29) | 145,19 (104,94, 189,21) | 60980,8 (43118,84, 81494,72) | 317 (224,14, 423,63) | 1,26 (-2,22, 4,85) |
| Rwanda | 205171,64 (155906,09, 263711,51) | 135,85 (103,23, 174,62) | 318515,34 (244975,48, 410474,84) | 217,09 (166,97, 279,77) | 1,31 (-2,17, 4,93) |
| Saint Kitts and Nevis | 5896,6 (3738,19, 8173,41) | 82,21 (52,12, 113,95) | 9109,38 (5872,57, 12939,7) | 71,79 (46,28, 101,98) | 5,03 (1,61, 8,56) |
| Saint Lucia | 211,74 (165,09, 258,38) | 512,04 (399,23, 624,82) | 367,04 (274,58, 469,23) | 616,79 (461,42, 788,51) | 1,63 (-1,49, 4,86) |
| Saint Vincent and the Grenadines | 526,54 (392,59, 665,18) | 383,21 (285,72, 484,11) | 1208,93 (880,71, 1604,63) | 692,3 (504,34, 918,9) | -0,19 (-2,98, 2,69) |
| Samoa | 409,02 (309,2, 508,68) | 371,63 (280,94, 462,18) | 700,99 (494,94, 936,47) | 619,56 (437,44, 827,68) | 1,04 (-2,02, 4,19) |
| San Marino | 426,75 (300,77, 577,97) | 260,79 (183,81, 353,2) | 975,35 (697,37, 1292,31) | 461,48 (329,95, 611,44) | -2,1 (-4,9, 0,79) |
| Sao Tome and Principe | 35,1 (25,64, 46,28) | 148,99 (108,84, 196,48) | 90,89 (64,17, 122,55) | 274,6 (193,88, 370,23) | -1,13 (-3,91, 1,72) |
| Saudi Arabia | 63,3 (44,06, 85,19) | 52,08 (36,25, 70,09) | 130,61 (88,02, 178,38) | 63,59 (42,85, 86,85) | 4,8 (1,66, 8,04) |
| Senegal | 11845,34 (7647,46, 16401,95) | 73,83 (47,66, 102,22) | 60143,98 (40256,03, 84912,98) | 168,32 (112,66, 237,64) | 0,6 (-2,29, 3,58) |
| Serbia | 8568,37 (6491,34, 10819,11) | 112,44 (85,18, 141,97) | 24717,72 (18007,01, 32152,48) | 163,33 (118,98, 212,45) | 2,81 (-0,22, 5,92) |
| Seychelles | 24698,83 (17635,05, 32343,31) | 262,82 (187,66, 344,17) | 39390,67 (27662,5, 52728,49) | 450,34 (316,26, 602,83) | -0,25 (-3,34, 2,94) |
| Sierra Leone | 79,91 (56,99, 105,54) | 109,42 (78,03, 144,52) | 294,73 (202,36, 406) | 288,54 (198,11, 397,47) | 0,78 (-2,11, 3,76) |
| Singapore | 3093,06 (2367,37, 3888,83) | 84,69 (64,82, 106,48) | 8286,03 (6085,9, 10907,72) | 100,02 (73,46, 131,66) | 2,61 (-0,68, 6,01) |
| Slovakia | 4771,14 (3417,17, 6279,57) | 156,57 (112,14, 206,08) | 10547,83 (6710,8, 15099,32) | 186,11 (118,41, 266,42) | 0,94 (-2,73, 4,74) |
| Slovenia | 10916,45 (8215,64, 13809,35) | 206,64 (155,51, 261,4) | 18205,2 (13024,48, 24399,4) | 334,83 (239,54, 448,75) | 1,72 (-1,69, 5,25) |
| Solomon Islands | 4415,54 (3166,89, 5895,2) | 224,02 (160,67, 299,08) | 7566,29 (5251,44, 10288,09) | 364,77 (253,17, 495,99) | 0,57 (-2,58, 3,83) |
| Somalia | 884,11 (604,01, 1261,14) | 259,69 (177,42, 370,44) | 3352,41 (2335,85, 4499,65) | 511,32 (356,27, 686,31) | 2,51 (-0,96, 6,1) |
| South Africa | 9553,18 (6696,97, 12721,26) | 133,66 (93,7, 177,98) | 25327,18 (18430, 33490,71) | 124,5 (90,6, 164,63) | 0,57 (-1,83, 3,03) |
| South Korea | 70959,77 (55684,92, 86291,44) | 192,67 (151,2, 234,3) | 235095,89 (187437,87, 282619,18) | 422,92 (337,19, 508,41) | 0,76 (-2,27, 3,88) |
| South Sudan | 4437,16 (3013,89, 6151,2) | 75,73 (51,44, 104,98) | 7579,41 (4993,75, 10473,54) | 81,65 (53,79, 112,83) | 0,79 (-2,17, 3,84) |
| Spain | 119288,41 (91186,54, 153440,72) | 307,59 (235,13, 395,66) | 178193,06 (126980,46, 243735,89) | 387,2 (275,92, 529,62) | 0,37 (-2,22, 3,02) |
| Sri Lanka | 18900,01 (13764,01, 24415,93) | 109,75 (79,92, 141,78) | 89976,43 (64069,11, 119466,28) | 411,71 (293,16, 546,65) | 0,31 (-2,18, 2,87) |
| Sudan | 12832,76 (8858,02, 17463,74) | 63,53 (43,85, 86,46) | 42670,25 (29232,54, 58476,8) | 104,56 (71,63, 143,3) | 1,4 (-2,15, 5,09) |
| Suriname | 825,63 (599,05, 1068,78) | 213,56 (154,95, 276,45) | 2686,22 (1874,94, 3563,35) | 466,45 (325,57, 618,76) | -2,31 (-5,12, 0,58) |
| Sweden | 17771,3 (13669,65, 22376,55) | 206,91 (159,16, 260,53) | 29323,47 (21890,94, 37887,34) | 286,85 (214,14, 370,63) | -0,93 (-4,56, 2,84) |
| Switzerland | 16465,75 (12701,6, 20434,57) | 239,84 (185,01, 297,65) | 25066,5 (18065,8, 33662,78) | 285,65 (205,87, 383,61) | 2,96 (-0,33, 6,34) |
| Syria | 8344,55 (5601,44, 11156,59) | 64,71 (43,44, 86,52) | 23445,56 (15571,92, 32303,86) | 161,79 (107,46, 222,92) | 3,19 (-0,5, 7,02) |
| Taiwan (Province of China) | 38839,16 (29219,53, 49715,66) | 190,4 (143,24, 243,71) | 98560,07 (71126,34, 128951,3) | 417,27 (301,12, 545,94) | -1,31 (-4,16, 1,63) |
| Tajikistan | 5230,42 (4037,51, 6460,95) | 97,3 (75,11, 120,19) | 23099,34 (17247,83, 29053,73) | 243,35 (181,7, 306,07) | 3,2 (-0,08, 6,59) |
| Tanzania | 61183,43 (43834,15, 79332,15) | 107,57 (77,07, 139,48) | 153519,36 (103740,45, 214285,3) | 218,96 (147,96, 305,63) | -0,27 (-3,54, 3,11) |
| Thailand | 516,88 (376,62, 687,03) | 66,02 (48,1, 87,75) | 1893,84 (1315,38, 2518,85) | 141,88 (98,54, 188,7) | 1,19 (-2,08, 4,56) |
| Timor-Leste | 2248,18 (1723,37, 2800,19) | 61,38 (47,05, 76,45) | 8505,33 (6304,52, 11268,5) | 107,37 (79,59, 142,25) | 1,25 (-1,19, 3,74) |
| Togo | 6,55 (4,58, 8,83) | 388,29 (271,28, 523,39) | 8,44 (5,77, 11,49) | 597,99 (408,64, 814,61) | -0,44 (-3,35, 2,55) |
| Tokelau | 307,3 (223,35, 395,83) | 317,5 (230,76, 408,96) | 522,27 (368,07, 697,37) | 510,28 (359,62, 681,35) | 1,42 (-1,65, 4,6) |
| Tonga | 7620,26 (5866,75, 9264,15) | 633,43 (487,67, 770,08) | 14307,37 (10083,87, 18872,97) | 1031,19 (726,79, 1360,26) | -2,03 (-5,48, 1,55) |
| Trinidad and Tobago | 6165,98 (4045,03, 8659,14) | 73,06 (47,93, 102,61) | 23879,67 (15241,18, 33755,42) | 206,36 (131,71, 291,71) | -0,43 (-3,63, 2,88) |
| Tunisia | 79270,95 (55316,03, 104384,84) | 132,62 (92,54, 174,64) | 153526,6 (106800,75, 205564,69) | 188,7 (131,27, 252,66) | 1,38 (-1,28, 4,11) |
| Turkey | 3757 (2950,5, 4711,28) | 101,4 (79,63, 127,15) | 15217,28 (11522,13, 19303,54) | 299,37 (226,68, 379,76) | 1,11 (-1,89, 4,19) |
| Turkmenistan | 43,56 (31,12, 57,57) | 466,06 (333, 615,98) | 81,5 (56,44, 113,57) | 690,77 (478,41, 962,62) | 0,65 (-1,91, 3,28) |
| Tuvalu | 9477,48 (6034,85, 13269,01) | 54,73 (34,85, 76,63) | 26300,98 (16928,62, 36842,37) | 63,96 (41,17, 89,6) | 0,03 (-2,87, 3,02) |
| Uganda | 68794,9 (50593,94, 89852,6) | 130,63 (96,07, 170,62) | 76456,51 (54113,54, 103887) | 173,6 (122,87, 235,88) | -0,57 (-3,23, 2,17) |
| UK | 2126,19 (1589,39, 2751,48) | 113,57 (84,9, 146,98) | 19465,05 (12913,06, 27862,42) | 210,62 (139,73, 301,49) | 1 (-2,01, 4,1) |
| Ukraine | 128306,34 (98566,37, 163561,07) | 223,25 (171,5, 284,59) | 247992,1 (172190,89, 337083,69) | 368,92 (256,16, 501,46) | 1,56 (-1,89, 5,13) |
| United Arab Emirates | 19718,28 (14433, 25179,59) | 76,13 (55,72, 97,21) | 44792,16 (31154,72, 60311,35) | 78,95 (54,91, 106,3) | 0,7 (-2,83, 4,36) |
| Uruguay | 734879,44 (583451,11, 914525,7) | 289,77 (230,06, 360,61) | 1631916,93 (1261918,53, 2106610,88) | 497,57 (384,76, 642,3) | 0,6 (-1,75, 3) |
| USA | 241,33 (172,43, 315,28) | 227,64 (162,65, 297,4) | 591,05 (412,55, 790,77) | 568,39 (396,74, 760,46) | 3,61 (0,39, 6,94) |
| Uzbekistan | 6318,67 (5301,88, 7295,64) | 201,27 (168,88, 232,39) | 10891,79 (8514,98, 13682,46) | 316,98 (247,81, 398,19) | -0,97 (-4,06, 2,21) |
| Vanuatu | 17965,05 (13978,32, 22231,09) | 85,76 (66,73, 106,13) | 109606,39 (83993,92, 138606,39) | 325,46 (249,41, 411,57) | 1,62 (-1,2, 4,53) |
| Venezuela | 228,51 (154,4, 331,01) | 150,95 (101,99, 218,66) | 1062,08 (732,65, 1459,64) | 360,58 (248,74, 495,55) | 2,14 (-1,02, 5,41) |
| Vietnam | 28011,28 (20579,48, 36286,43) | 148,76 (109,29, 192,71) | 107103,62 (76415,06, 142405,85) | 381,57 (272,24, 507,34) | 2,19 (-0,7, 5,17) |
| Virgin Islands US | 85201 (63148,85, 108802,14) | 125,4 (92,95, 160,14) | 224625,08 (161343,92, 297491,37) | 233,08 (167,42, 308,69) | 0,59 (-2,5, 3,79) |
| Yemen | 6705,94 (4635,31, 9171,95) | 48,84 (33,76, 66,81) | 27616,42 (19299,95, 37875,8) | 87,66 (61,26, 120,23) | 1,66 (-1,37, 4,77) |
| Zambia | 8290,96 (6253,28, 10402,65) | 104,38 (78,73, 130,97) | 21066,2 (15555,42, 27319,96) | 115,51 (85,29, 149,8) | 1,31 (-1,99, 4,71) |
| Zimbabwe | 9941,29 (7637,95, 12352,45) | 96,16 (73,88, 119,48) | 29159,02 (20774,23, 37966,79) | 194,25 (138,39, 252,93) | 0,12 (-2,59, 2,9) |

*No., number; DALYs, disability-adjusted life years; ASDR, age-standardized DALY rate; UI, uncertainty interval; EAPC, estimated annual percentage change; CI, confidence interval.*

**
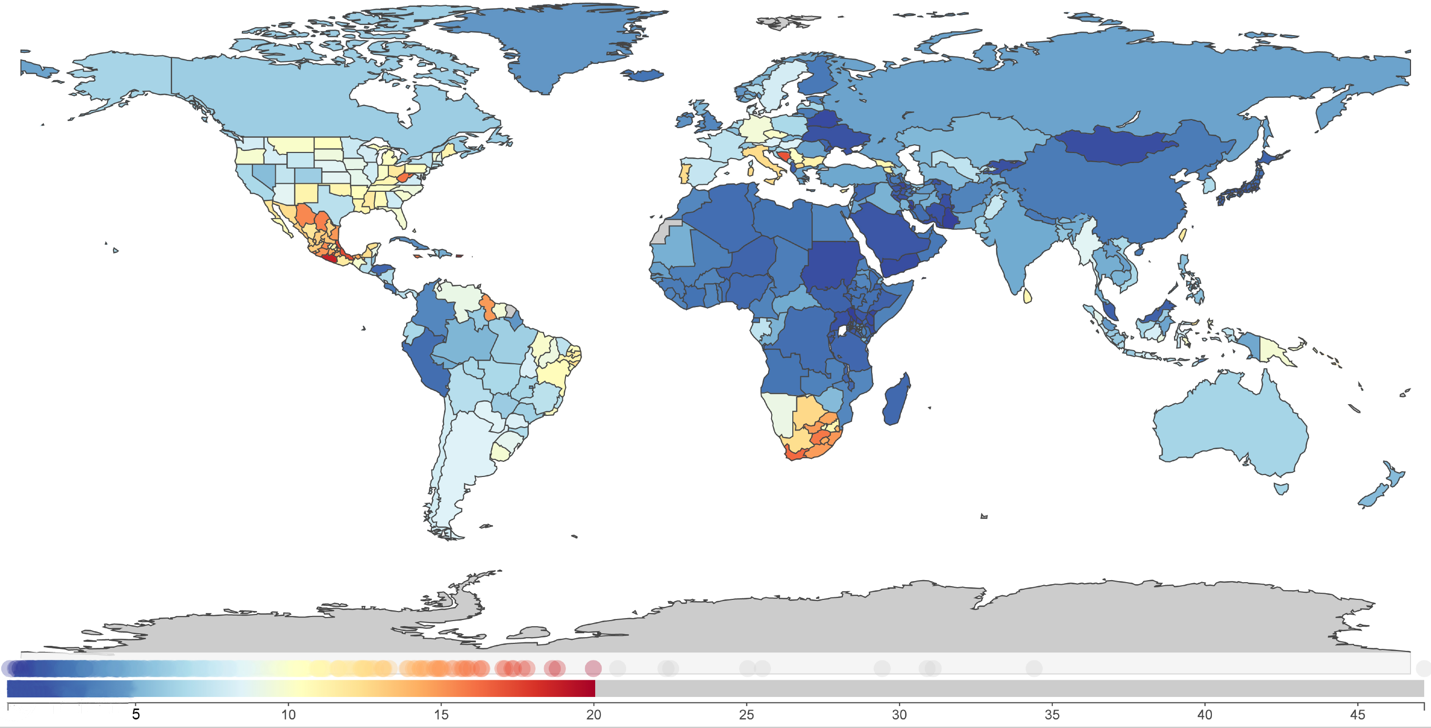
**

Figure S1. ASMR for T2DM attributable to dietary risk factors in 2019 in 204 countries and territories


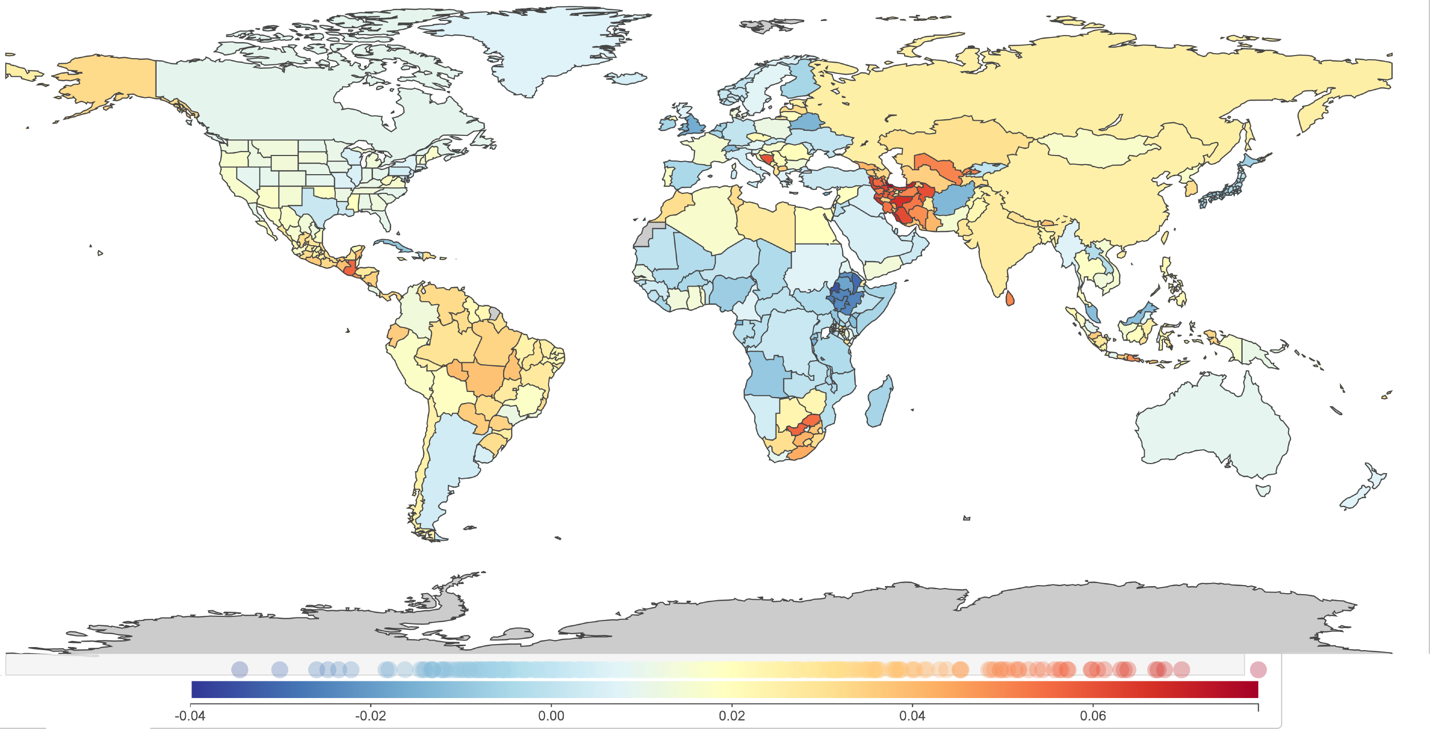


Figure S2. EAPC of ASMR for T2DM attributable to dietary risk factors between 1990 and 2019 in 204 countries and territories.


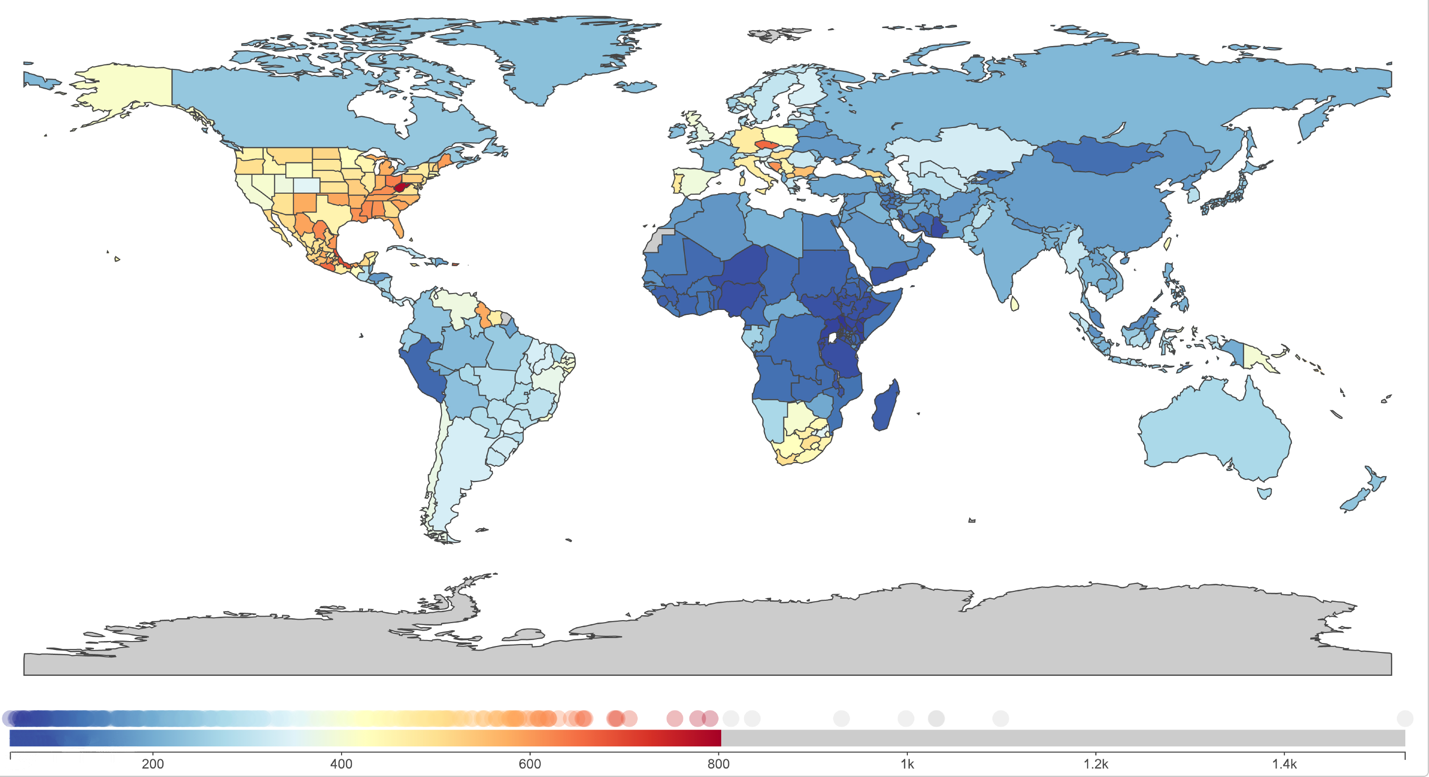


Figure S3. ASDR for T2DM attributable to dietary risk factors in 2019 in 204 countries and territories


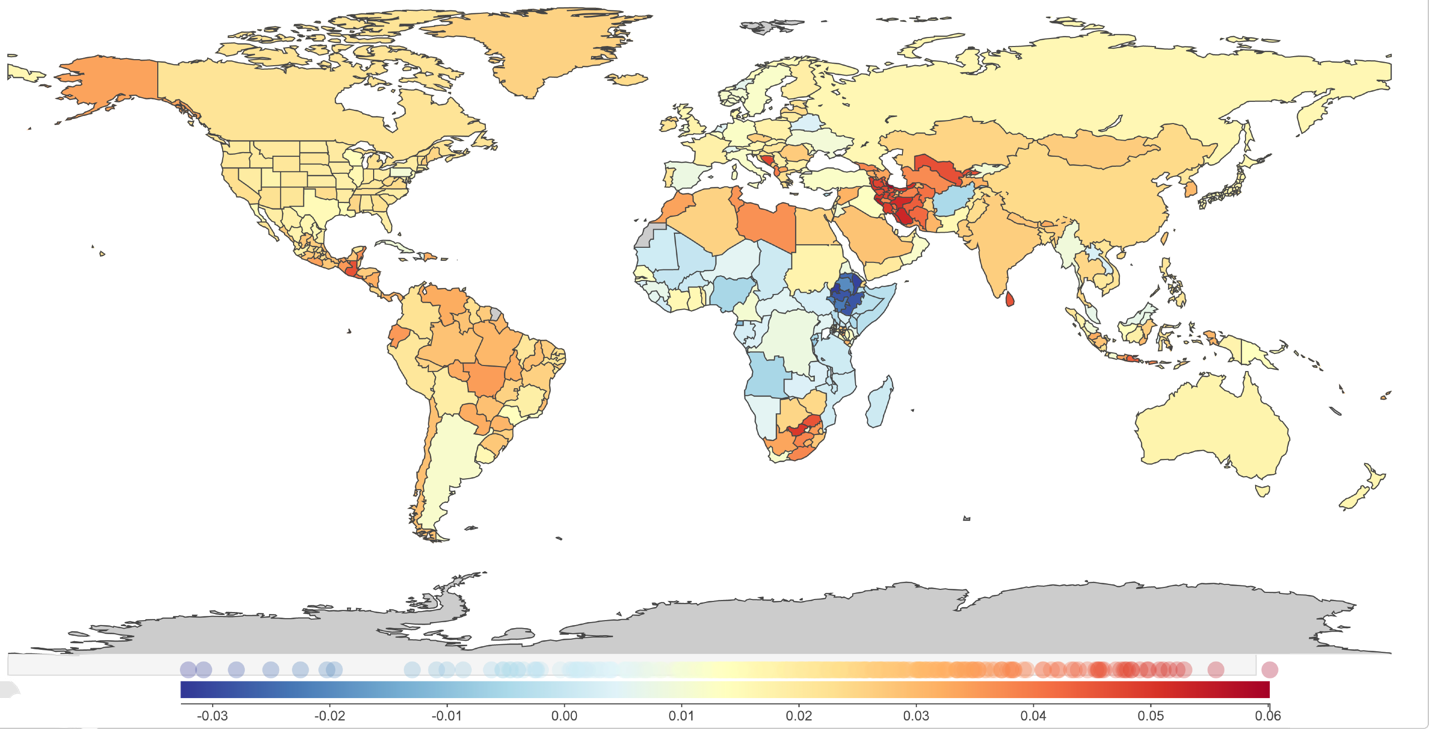


Figure S4. EAPC of ASDR for T2DM attributable to dietary risk factors, between 1990 and 2019 in 204 countries and territories
